1 **Collagen-binding integrin  $\alpha 11\beta 1$  contributes to joint destruction in arthritic**  
2 **hTNFtg mice**

3 Adrian Deichsel<sup>1\*</sup>, Anna De Giuseppe<sup>1\*</sup>, Isabel Zeinert<sup>2</sup>, Kerstin Rauwolf<sup>1</sup>, Ning Lu<sup>3</sup>,  
4 Denise Beckmann<sup>1</sup>, Annika Krause<sup>1</sup>, Beate Eckes<sup>2</sup>, Uwe Hansen<sup>1</sup>, Daniel  
5 Kronenberg<sup>1</sup>, Donald Gullberg<sup>3</sup>, Thomas Pap<sup>1</sup>, Adelheid Korb-Pap<sup>1</sup>

6 \*these authors contributed equally to this work

7

8 <sup>1</sup>Institute of Musculoskeletal Medicine, University Hospital Muenster, Albert-  
9 Schweitzer-Campus 1, Building D3, 48149 Muenster, Germany

10 <sup>2</sup>Translational Matrix Biology, Faculty of Medicine, University of Cologne, Joseph-  
11 Stelzmann-Str. 52, Building 44, 50931 Cologne, Germany

12 <sup>3</sup>Department of Biomedicine, University of Bergen, Jonas Lies vei 91, N-5009  
13 Bergen, Norway

14

15 \*correspondence to: Adelheid Korb-Pap, MD E-mail: [korba@uni-muenster.de](mailto:korba@uni-muenster.de)

## 16 Abstract

### 17 **Background:**

18 In rheumatoid arthritis (RA), fibroblast like synoviocytes (FLS) undergo a “tumor-like”  
19 transformation, wherein they develop an aggressive phenotype that is characterized  
20 by increased adhesion to components of cartilage extracellular matrix (ECM) and that  
21 contributes extensively to joint destruction. The collagen binding integrin  $\alpha 11\beta 1$  was  
22 previously shown to be involved in similar processes in cancer-associated fibroblasts  
23 mediating tumorigenicity and metastasis in certain tumors. Therefore, this study  
24 aimed to study the role of integrin  $\alpha 11\beta 1$  in RA and to characterize the effects of  
25  $\alpha 11\beta 1$  deficiency on the disease course and severity in arthritic hTNFtg mice.

### 26 **Methods:**

27 The expression levels of integrin  $\alpha 11\beta 1$  were analyzed by immunohistochemistry,  
28 immunofluorescence, and western blot analysis in synovial samples and FLS of  
29 patients with RA and osteoarthritis (OA) as well as in samples from wild type (wt) and  
30 arthritic hTNFtg mice. Furthermore, the subcellular expression of integrin  $\alpha 11\beta 1$  was  
31 investigated in co-culture experiments with cartilage explants and analyzed by  
32 transmission electron microscopy. To investigate the effects of integrin  $\alpha 11\beta 1$   
33 deficiency, *itga11*<sup>-/-</sup> mice were interbred with hTNFtg mice and disease severity was  
34 assessed by clinical scoring of grip strength and paw swelling over the disease  
35 course. Hind paws of 12-weeks-old mice of all genotypes were analyzed by  $\mu$ CT  
36 imaging followed by stainings of paraffin-embedded tissue sections with Toluidine-  
37 blue and tartrate-resistant acid phosphatase (TRAP) to evaluate established  
38 parameters of joint destruction such as inflammation area, cartilage destaining, FLS  
39 attachment to the cartilage surface, and bone damage.

40 **Results:**

41 Expression levels of integrin  $\alpha 11\beta 1$  were clearly elevated in synovial tissues and FLS  
42 from RA patients and hTNFtg mice, compared to the controls derived from OA  
43 patients and wt mice. Interestingly, this expression was shown to be particularly  
44 localized in focal adhesions of the FLS. As revealed by transmission electron  
45 microscopy, integrin  $\alpha 11\beta 1$  expression was particularly evident in areas of direct  
46 cellular contact with the ECM of cartilage. Evaluations of clinical scorings and  
47 histomorphological analyses demonstrated that *itga11*<sup>-/-</sup>hTNFtg displayed alleviated  
48 clinical symptoms, higher bone volume, less cartilage destruction and reduced FLS  
49 attachment to the cartilage in comparison to hTNFtg mice.

50 **Conclusions:**

51 The collagen-binding integrin  $\alpha 11\beta 1$  is upregulated in the context of RA and its  
52 deficiency in mice with an inflammatory hTNFtg background leads to a significant  
53 reduction in the arthritic phenotype which makes integrin  $\alpha 11\beta 1$  an interesting target  
54 for therapeutical intervention.

55 **Keywords:**

56 Rheumatoid arthritis; Fibroblast like synoviocytes; Integrin alpha11beta 1; Itga11

## 57 Background

58 Rheumatoid arthritis (RA) is a chronic systemic inflammatory disease with a high  
59 prevalence and socioeconomic burden affecting joints in a characteristic symmetrical  
60 pattern. If untreated, RA leads to massive irreversible destruction of articular  
61 structures such as cartilage and bone. It has been shown that, in addition to the influx  
62 of immune and inflammatory cells, fibroblast-like synoviocytes (FLS) can be  
63 attributed a key role in the pathogenesis of RA, as these cells are known to  
64 contribute significantly to the development, progression and chronic course of this  
65 disease [1]. A major feature of FLS in RA is their stable activation and transformation  
66 into an autonomously aggressive phenotype. This, among other features, leads to an  
67 increased expression of adhesion molecules, triggering further destructions of  
68 cartilage as these facilitate the binding of RA-FLS to components of the extracellular  
69 matrix (ECM) [2,3].

70 In this context, different matrix adhesion molecules such as integrins and syndecans  
71 were shown to play important roles in the attachment of RA-FLS to collagens [4-6].  
72 One member of the  $\beta 1$ - family of integrins that has not been investigated in detail in  
73 RA, is integrin  $\alpha 11\beta 1$ . Integrin  $\alpha 11\beta 1$  is encoded by the gene *itga11* and one of four  
74 known integrins (besides  $\alpha 1\beta 1$ ,  $\alpha 2\beta 1$  and  $\alpha 10\beta 1$ ) to bind to collagen [7, 8]. First  
75 discovered in 1995 by Gullberg et al, it was shown to be expressed mainly on cells of  
76 mesenchymal origin, notably fibroblasts [9-11]. Integrin  $\alpha 11\beta 1$  was demonstrated to  
77 mediate not only cellular adhesion but also cell migration, collagen reorganization  
78 and the expression of matrix modifying enzymes [7, 12, 13]. In the tumor-context,  
79 integrin  $\alpha 11\beta 1$  as expressed in cancer-associated fibroblasts (CAFs) within the tumor  
80 stroma has been shown to positively influence tumor growth, metastatic potential and  
81 negatively affect disease outcome [14-16].

82

83 Due to the similarities between tumor cells and RA-FLS, which amongst others are  
84 characterized by increased adhesion, migration and invasion capacities, we  
85 hypothesized that  $\alpha 11\beta 1$  not only plays a role on CAFs in different cancer types, but  
86 could also trigger disease severity also in RA.

87

88

## 89 Methods

### 90 **Human synovial tissues and fibroblast-like synoviocytes.**

91 The ethics committees of the Medical University of the University Hospital Muenster  
92 approved all studies with human samples. Samples of synovial tissues from subjects  
93 with RA or OA (according to the 1987 revised American College of Rheumatology  
94 criteria for RA and OA [17]) were obtained as operational waste at joint replacement  
95 surgery and all subjects gave informed consent prior to surgery.

96 RA-FLS and OA-FLS were isolated by enzymatic digestion using the collagenase type  
97 IV (Worthington Biochemicals) and cultured in 10% heat-inactivated FCS-  
98 supplemented Dulbecco's modified Eagle's medium at 37°C and 5% CO<sub>2</sub>. Cell  
99 suspension was centrifuged at 1500 rpm and RT for 5 minutes, the pellet was  
100 resuspended with DMEM and FLS were cultured under standard conditions. To  
101 eliminate initial contaminations with other cells, only cells at passages 3 to 5 were used  
102 for experiments.

103

### 104 **Animals.**

105 The hTNFtg mice carrying the transgene from human tumor necrosis factor- $\alpha$  (strain  
106 Tg197; C57BL/6 genetic background; obtained from Alexander Fleming Biomedical  
107 Science Research Center, Vari, Greece) and  $\alpha$ 11 $\beta$ 1 mice (kindly provided by D.  
108 Gullberg, Bergen, Norway) were described previously [18, 19]. Both mouse strains  
109 were interbred within the C57BL/6 genetic background. The genotype was confirmed  
110 by polymerase chain reaction (primer sequence, see Tab. 1). Mice were scored on a  
111 weekly basis up to an age of 12 weeks to evaluate arthritis symptoms. The evaluation  
112 was based on a scoring range from 0 (no symptoms) to 3 (severe symptoms), including  
113 grip strength, paw swelling and weight [20]. All animal procedures were approved by

114 the State Office for Nature, Environment and Consumer Affairs (Landesamt für Natur,  
115 Umwelt und Verbraucherschutz LANUV), Germany (reference numbers AZ 84-  
116 02.04.2015.A511).

117

### 118 **Isolating and fibroblast-like synoviocytes from mice.**

119 Mice were sacrificed in accordance with the German animal welfare act using carbon  
120 dioxide (CO<sub>2</sub>). Skin and nails of the hind paws were removed and the larger ligaments  
121 were dissected. Finally, the hind paws were dislocated and paws were digested with  
122 1mg/ml collagenase (Collagenase Type IV, Worthington Biochemicals) in Dulbecco's  
123 modified Eagle's medium (DMEM) for 1 h at 37°C. After digestion the cell suspension  
124 was centrifuged at 1500 rpm and RT for 5 minutes. The supernatant was discarded,  
125 the pellet resuspended in DMEM supplemented with 10% heat-inactivated fetal calf  
126 serum (h-FCS) and 1% Penicillin-Streptomycin. Isolated fibroblasts were cultured at  
127 37°C and 5% CO<sub>2</sub>, experiments were performed between passage 3 and 5.

128

### 129 **Cartilage attachment assay and transmission electron microscopy**

130 As previously described [4], freshly isolated cartilage of the femoral head of 4-6 weeks  
131 old mice and isolated wt and hTNFtg FLS were co-cultivated in FLS medium for three  
132 days followed by transmission electron microscopy and immunogold-mediated  
133 detection of integrin  $\alpha 11\beta 1$ .

134

### 135 **Preparation of human and murine tissues for histology**

136 Human samples from RA and OA patients as well as the hind paws from twelve weeks  
137 old mice were fixed in 4% paraformaldehyde overnight at 4°C and decalcified in 20%  
138 Na-ETDA (*AppliChem*) for eight weeks. Afterwards, decalcified tissues were  
139 dehydrated and embedded in paraffin. Paraffin-embedded human tissues and hind

140 paws were cut into 5  $\mu\text{m}$  sections with the Microtome HM355S (*Thermo Fisher*  
141 *Scientific*) and transferred onto microscope slides.

142

### 143 **Immunohistochemistry staining of human and murine synovial tissue.**

144 Sections of decalcified, paraffin-embedded hind paws and human synovial tissues  
145 were deparaffinate in xylene and rehydrated in decreasing concentrations of ethanol.  
146 Subsequently, sections were incubated in distilled water and washed in PBS.  
147 Peroxidase activity was blocked with a 30% hydrogen peroxide solution in methanol.  
148 The sections were pretreated with 1x trypsin for 10 min at 37°C and blocked with 20%  
149 normal horse serum for 1 hour. Human tissues were stained with a sheep polyclonal  
150 antibody to integrin  $\alpha 11$  (*R&D Systems*) and murine tissues with a rabbit polyclonal  
151 antibody to mouse  $\alpha 11$  generated and kindly provided by Donald Gullberg  
152 (Department of Biomedicine, University of Bergen, Norway). As secondary antibody, a  
153 biotinylated anti-sheep IgG or anti-rabbit IgG (*Vector Laboratories*) were used. The  
154 stainings were performed using the Vectastain ABC peroxidase kit and DAB substrate  
155 kit (*Vector Laboratories*). Counterstaining was conducted with Mayer's Haemalaun  
156 (*Sigma-Aldrich*). Sections were mounted with Dibutylphthalate polystyrene xylene  
157 (DPX) for microscopy.

158

### 159 **Toluidine-blue and haematoxylin-eosin (HE) staining of paraffin sections.**

160 Paraffin sections were deparaffinate in xylene and rehydrated in decreasing  
161 concentrations of ethanol. Subsequently sections were incubated in distilled water and  
162 stained with Toluidine-blue (*Sigma-Aldrich*) or Mayer's Haemalaun (*Sigma-Aldrich*)  
163 and eosin Y (*Sigma-Aldrich*). Stained sections were dehydrated in increasing



164 concentration of ethanol and incubated in xylene followed by mounting the slides with  
165 DPX.

166

### 167 **TRAP staining.**

168 The tartrate-resistant acid phosphatase (TRAP) kit (*Sigma-Aldrich*) was used for  
169 osteoclasts detection on paraffin sections of twelve weeks old hind paws using the  
170 TRAP kit following the manufacturer's instructions.

171

### 172 **Integrin $\alpha 11\beta 1$ expression levels in murine and human FLS.**

173 FLS were lysed in radioimmunoprecipitation assay (RIPA) buffer. Protein  
174 concentrations were determined by a bichinonic acid (BCA) protein assay kit (*Thermo*  
175 *Fisher*) according to manufactures instructions. The protein extracts were resolved by  
176 a dodecyl sulfate polyacrylamide gel electrophoresis using a 12% separation gel. Gels  
177 were transferred to a polyvinylidene difluoride (PVDF) membrane (*GE Healthcare*) in  
178 a Trans-Blot Turbo device (Bio-Rad). Integrin  $\alpha 11$  expression levels were detected by  
179 rabbit polyclonal antibodies to human or mouse integrin  $\alpha 11$  (provided by Donald  
180 Gullberg, Department of Biomedicine, University of Bergen, Norway) and the  
181 polyclonal anti-rabbit immunoglobulins/HRP (*Dako*). Images were analyzed using the  
182 gel analyzing tool by *ImageJ*, version 2.1.0/1.53c.

183

### 184 **Immunofluorescence staining of human and mouse FLS.**

185 Cells were seeded on sterile glass coverslips coated with bovine collagen coating  
186 solution (*Cell Applications, INC.*) for improved attachment. FLS were incubated in  
187 DMEM supplemented with 10% h-FCS at 37°C and 5% CO<sub>2</sub> overnight. Thereafter,  
188 cells were washed in PBS and fixed for 20 minutes in 4% paraformaldehyde. Next,  
189 ammonium chloride was used to reduce the auto-fluorescence of the cells followed by

190 permeabilization with 0.1% Triton X-100. Afterwards, FLS were incubated with 10%  
191 normal horse serum for 20 minutes at RT. Murine and human cells were stained with  
192 primary antibodies (polyclonal antibody for mouse and human  $\alpha$ 11; Donald Gullberg)  
193 for one hour and with the secondary Alexa Four 488 antibody (*Life Technologies*) for  
194 30 minutes at RT. The cytoskeleton was stained with rhodamine phalloidin (*Invitrogen*)  
195 and nuclei stained with 4',6-diamidino-2-phenylindole (DAPI) (*Invitrogen*). Mowiol was  
196 used as mounting medium.

197

### 198 **Histomorphometric analysis.**

199 Toluidine-blue stained sections were used for analyzing synovial inflammation, total  
200 cartilage area, cartilage damage, and attachment of FLS to the cartilage surface .  
201 Destained cartilage as a result of proteoglycan loss and cartilage degradation was  
202 quantified to the total amount of cartilage and indicated as a percentage. Synovial  
203 inflammation area was evaluated by relating the pannus tissue to the total tissue area  
204 expressed as a percentage, furthermore the length of the FLS attachment to the  
205 cartilage surface was evaluated. pannus tissue invading the cartilage. Quantification  
206 of the images were performed by using Zen Pro Software (*Zeiss*).

207

### 208 **Micro-computed tomographic analysis.**

209 The right hind paws from twelve weeks old mice were dissected from the leg, the skin  
210 and claws were removed and fixed overnight in 4% paraformaldehyde at 4°C. Hind  
211 paws were transferred in PBS and scanned with the *SkyScan 1176 (Bruker, version*  
212 *11.0.0.2)* at 40 kV tube voltage, 0.6 mA using an aluminium filter (0.2 mm thick) and  
213 0.5° rotation steps. Associated software was used for the reconstructions (*NRecon,*  
214 *version 1.7.5.9*), 3-dimensional visualization (*CTVox, version 3.3.0r1412*) and analysis  
215 (*Data Viewer, version 1.5.6.6* and *CTAn, version 1.20.3.0*). BV/TV was measured from

216 the tarsal bones 2-4 by drawing manually the borders of the bones and calculating the  
217 average.

218

219 **Statistical analysis.**

220 Graphs are represented as box-plots showing all data points with whiskers from  
221 minimum to maximum. The software *GraphPad Prism 9* was used for statistical  
222 analysis. Comparison of the different groups were performed by the two-tailed Mann-  
223 Whitney U test. P-values of less than 0.05 were considered to be statistically  
224 significant.

225

226

## 227 Results

### 228 **Integrin $\alpha 11\beta 1$ is upregulated in RA-FLS in the context of RA and in the hTNFtg** 229 **mouse model**

230 To assess the expression levels of integrin  $\alpha 11\beta 1$ , paraffin-embedded human  
231 synovial tissues obtained from RA patients and - as a control - from OA patients  
232 undergoing joint replacement surgery were stained by immunohistochemistry for  
233 integrin  $\alpha 11\beta 1$ . Tissue samples from RA patients displayed the characteristic  
234 formation of an invasive hypercellular pannus and a highly upregulated expression of  
235 integrin  $\alpha 11\beta 1$ . In comparison, no pannus formation and very weak integrin  $\alpha 11\beta 1$   
236 expression were observed in tissues from OA patients (Figure 1a). As a next step, we  
237 tested whether a staining pattern comparable to the human situation could be seen in  
238 an animal model of RA. To this end, decalcified, paraffin-embedded and sectioned  
239 hind paws derived from wild type (wt) and hTNFtg mice at an age of twelve weeks  
240 were used for immunohistochemistry stainings using a specific antibody against  
241 integrin  $\alpha 11\beta 1$ . The hTNFtg mouse model is a well described mouse model for  
242 inflammatory polyarthritis and is characterized by a spontaneous joint inflammation  
243 due to genetic alteration leading to an ubiquitous overexpression of human TNF $\alpha$   
244 [18]. Comparable to the staining pattern in human RA synovial tissues, hTNFtg mice  
245 also showed a strong upregulation of integrin  $\alpha 11\beta 1$  expression whereas only a faint  
246 staining for integrin  $\alpha 11\beta 1$  was found in wt section (Figure 1a).

247 As it is known that integrin  $\alpha 11\beta 1$  is mainly restricted to mesenchymal cells, FLS  
248 from RA and OA patients and from wt and hTNFtg mice were analyzed for their  
249 expression levels of integrin  $\alpha 11\beta 1$  as well as its subcellular expression pattern. In  
250 line with the previous *in vivo* data, RA-FLS and hTNFtg FLS showed an increased  
251 expression of integrin  $\alpha 11\beta 1$  compared to the controls, and integrin  $\alpha 11\beta 1$  was found

252 primarily at focal adhesion sites (Figure 1b). Since both the immunohistochemical  
253 images of the paws and the immunofluorescence of the FLS showed an upregulation  
254 of integrin  $\alpha11\beta1$  expression under inflammatory conditions, Western blot analyses  
255 were performed for further quantification. In these analyses, we could confirm the  
256 previous observation that inflammatory conditions lead to increased integrin  $\alpha11\beta1$   
257 levels, observable both in human and murine FLS. Specifically, RA-FLS showed up  
258 to 3.5 times increased levels compared to OA-FLS (n=5, two-tailed Mann–Whitney U  
259 test, n.s.). In hTNFtg FLS up to 13.8 times higher expression levels were detectable  
260 as compared to wt FLS (n= 4, two-tailed Mann–Whitney U test,  $p < 0.05$ ) (Figure 1c).  
261 Next, we were interested to see if interactions between FLS and articular cartilage  
262 would affect the localization of integrin  $\alpha11\beta1$  and whether there are differences  
263 between wt and hTNFtg FLS. In an established *in vitro* attachment assay [4], co-  
264 cultures of hip caps from wt animals and FLS obtained from wt and hTNFtg animals  
265 were performed and analyzed by electron microscopy. Immunogold labelled particles  
266 detecting the anti-integrin  $\alpha11\beta1$  antibody demonstrated that in FLS-cartilage co-  
267 cultures there were striking differences between the genotypes not only in the  
268 integrin  $\alpha11\beta1$  expression levels, but also in the localization of integrin  $\alpha11\beta1$ . In  
269 hTNFtg FLS, a higher number of particles were detectable and most strikingly these  
270 were found particularly in areas with direct contact to the cartilage ECM in  
271 characteristic invading zones. Interestingly, some few particles were also found  
272 directly in the ECM itself. As an explanation for this phenomenon there might be also  
273 exist further FLS invasion zones which were not captured in these images. In  
274 contrast, very few particles were found in wt FLS with no prominent localization co  
275 cartilage contact areas (Figure 1d).

276

277

278 ***Itga11*<sup>-/-</sup>hTNFtg mice display an alleviated arthritic phenotype in comparison to**  
279 **hTNFtg mice**

280 *Itga11*<sup>-/-</sup>hTNFtg mice were obtained by crossbreeding of *itga11*<sup>-/-</sup> and hTNFtg mice.

281 Mice were scored on a weekly basis by two independent observers assessing paw  
282 swelling and loss of grip strength. Both *itga11*<sup>-/-</sup>hTNFtg and hTNFtg mice displayed  
283 an onset of symptoms at around 5 weeks of age with increasing disease severity  
284 over time, as previously described [18]. *Itga11*<sup>-/-</sup>hTNFtg mice displayed a slightly  
285 alleviated phenotype with attenuated loss of grip strength and reduced paw swelling  
286 (Figure 2a). Wild type and *itga11*<sup>-/-</sup> mice displayed no symptoms of inflammatory  
287 arthritis.

288 At the age of twelve weeks mice were sacrificed and  $\mu$ CT analyses of the hind paws  
289 were performed and analyzed qualitatively and quantitatively. In detail, less bone  
290 erosion was observed in hind paws from *itga11*<sup>-/-</sup>hTNFtg in comparison to hTNFtg  
291 mice (Figure 2b). Quantification of residual bone volume revealed significantly more  
292 bone volume in *itga11*<sup>-/-</sup>hTNFtg mice (+6.98% vs. hTNFtg,  $p < 0.005$ , two-tailed  
293 Mann–Whitney U test, Figure 2c), indicating less bone erosion in *itga11*<sup>-/-</sup>hTNFtg  
294 mice.

295 Histomorphological evaluations of joint pathologies were performed in H&E,  
296 Toluidine- blue and TRAP stainings of paraffin-embedded sections and evaluated in  
297 a blinded manner (Figure 2d). Overall, *itga11*<sup>-/-</sup>hTNFtg mice showed less joint  
298 destruction, marked by more intact cartilage and less osteoclast formation in  
299 comparison to hTNFtg mice. In histomorphometric quantification of Toluidine-blue  
300 stainings *itga11*<sup>-/-</sup>hTNFtg mice showed a higher amount of total cartilage area (+2.02  
301 % vs. hTNFtg,  $p < 0.05$ , two-tailed Mann–Whitney U test, Figure 2e) and a less  
302 destained cartilage (-16.08 % vs. hTNFtg,  $p < 0.05$ , two-tailed Mann–Whitney U test,  
303 Figure 2e) as markers for cartilage destruction. No significant differences between

304 *itga11*<sup>-/-</sup>hTNFtg and hTNFtg were found in the inflammation area (vs. hTNFtg,  $p >$   
305 0.05, two-tailed Mann–Whitney U test). However, a significant reduction in length of  
306 synovial attachment to cartilage surface was found in *itga11*<sup>-/-</sup>hTNFtg mice (-806  $\mu\text{m}$   
307 vs. hTNFtg,  $p < 0.05$ , two-tailed Mann–Whitney U test, Figure 2e).  
308

## 309 Discussion

310 Integrin  $\alpha11\beta1$  is known to play an active role in CAFs in various tumor entities, in  
311 which it was associated with migration on, and remodeling of collagen [21]. With RA-  
312 FLS displaying a “tumor-like” behavior, our study establishes a link between integrin  
313  $\alpha11\beta1$  and cartilage and bone destruction in RA in both human patients and an  
314 arthritis mouse model. So far integrin  $\alpha11\beta1$  has been described on cells of  
315 mesenchymal origin, including different types of fibroblasts [13, 19]. Several studies  
316 could also show that the expression of integrin  $\alpha11\beta1$  was upregulated by TGF $\beta$  and  
317 type 1 interferons, which are known to be involved in several autoimmune diseases  
318 and in RA-FLS transformation into the characteristic aggressive phenotype triggering  
319 further joint inflammation and destruction [22-25].

320 However, not all aspects of the functional role of integrin  $\alpha11\beta1$  in the context of RA  
321 have been understood so far. Although there is evidence that collagen citrullination  
322 negatively influences the adhesion of FLS by specifically decreasing the binding of  
323 integrin  $\alpha11\beta1$  to arginine-containing motifs thereby possibly modifying intracellular  
324 signaling in the pathogenesis of RA [26], analyses of the effects of integrin  $\alpha11\beta1$   
325 deficiency on joint destruction and disease course have not been performed before.  
326 However, several studies were able to show the role of other integrins in RA-FLS  
327 associated with increased matrix binding, migration, proliferation, and cartilage  
328 destruction [5, 6, 28].

329 We found that integrin  $\alpha11\beta1$  was upregulated in both human RA patients as well as  
330 in hTNFtg mice in comparison to non-inflammatory controls such as OA patients and  
331 wild type mice. In human RA samples, the expression of integrin  $\alpha11\beta1$  was mainly  
332 located at the synovial sublining layer as shown by immunohistochemistry.  
333 Interestingly, this was also observed in mice, but in addition, distinct staining clusters  
334 of integrin  $\alpha11\beta1$  were found in areas of pannus tissue adjacent to cartilage and



335 bone at joint destruction sites. Immunofluorescence studies and Western Blot  
336 analyses confirmed the elevated expression of integrin  $\alpha11\beta1$  in human and murine  
337 FLS under arthritic conditions indicating an inflammation-induced upregulation of  
338 integrin  $\alpha11\beta1$  in FLS. Supporting a role for integrin  $\alpha11\beta1$  in FLS mediated cartilage  
339 destruction, the subcellular expression pattern showed integrin  $\alpha11\beta1$  localization  
340 primarily at sites of focal adhesion and cellular invasion. This was also demonstrated  
341 in our *in vitro* co-culture studies in which hTNFtg FLS were seeded onto cartilage  
342 explants and analyzed by transmission electron microscopy.  
343 These results are in accordance with some published literature on the functional  
344 effects of integrin  $\alpha11\beta1$  outside the context of RA. In analogy to other collagen-  
345 binding integrins, integrin  $\alpha11\beta1$  was found to mediate fibroblast adhesion, cell  
346 migration and collagen reorganization as well as contraction and cell survival on  
347 collagen matrices leading to reduced proliferation and reduced adhesion to collagen  
348 in its absence [10, 29, 30]. In summary, the available literature suggests that integrin  
349  $\alpha11\beta1$  mediates cell survival, adhesion to matrix, migration, and matrix-remodeling in  
350 fibroblasts, which are all essential characteristics for joint destruction mediated by  
351 RA-FLS in RA.

352  
353 In our *in vivo* studies, knockout of *itga11* in the hTNFtg background resulted in the  
354 alleviation of the inflammatory arthritic phenotype as shown by clinical scoring,  $\mu$ CT  
355 imaging, and histological staining. Less cartilage destruction was observed in  
356 histomorphometric analyses of *itga11*<sup>-/-</sup>hTNFtg mice in comparison to hTNFtg  
357 animals. In detail, higher residual cartilage area after twelve weeks, and less  
358 destaining of articular cartilage, a surrogate for proteoglycan loss, were found in  
359 *itga11*<sup>-/-</sup>hTNFtg mice. Additionally, significantly less synovial attachment to cartilage  
360 was found in these mice. Attachment of RA-FLS to cartilage is a long-known hallmark

361 feature in the induction of invasive cartilage destruction [4, 31]. Similarly, absence of  
362 the collagen-binding integrin  $\alpha 2\beta 1$  in antigen-induced arthritis (AIA) and hTNFtg  
363 mice, was shown to reduce the attachment of FLS to cartilage and cartilage  
364 destruction overall [6].

365 Furthermore, *itga11*<sup>-/-</sup>hTNFtg mice displayed elevated residual bone volume at twelve  
366 weeks of age, as well as reduced osteoclast formation in TRAP stainings compared  
367 to hTNFtg animals, indicating that less bone degradation takes place in this  
368 genotype. Although FLS can trigger bone erosions indirectly [32], they are not the  
369 primary cell line responsible for bone degradation. However, RA-FLS were shown to  
370 strongly promote osteoclastogenesis from precursor cells by the RANKL-RANK  
371 pathway [33, 34], suggesting an indirect effect that will require further investigations.  
372 As a further potential explanation, integrin  $\alpha 11\beta 1$  has been suggested to be involved  
373 in maintaining adult skeletal bone mass via binding to Ostelectin/Clec11a on  
374 skeletal stem cells and other osteogenic progenitors in bone marrow. This notion has  
375 been derived from data showing that deletion of *itga11* from bone marrow stromal  
376 cells impaired osteogenic differentiation and reduced osteogenesis and accelerated  
377 bone loss during adulthood in mice and men [35] which will be of interest for further  
378 studies.

379

380 Integrins were previously proposed as a viable target for the treatment of RA [36,37].

381 This study shows, that integrin  $\alpha 11\beta 1$  plays a role in RA, and that absence of the  
382 molecule leads to partial reduction of hallmark features of RA. Further studies into  
383 the exact molecular mechanisms of how integrin  $\alpha 11\beta 1$  contributes to the aggressive  
384 phenotype of RA-FLS will be needed, to assess the potential of integrin  $\alpha 11\beta 1$  as a  
385 therapeutic target.

386

## 387 Conclusion

388 The results of this study suggest that the collagen-binding integrin  $\alpha 11\beta 1$  is  
389 upregulated in the context of RA and plays a role in adhesion and migration of  
390 fibroblasts on collagen and triggers cartilage degradation and destruction. The  
391 absence of integrin  $\alpha 11\beta 1$  in the hTNFtg mouse model leads to an alleviated  
392 phenotype, marked by reduced bone erosion and cartilage destruction, making the  
393 molecule a potentially interesting target for future therapeutical intervention studies.

394

## 395 Acknowledgements

396 This work was supported by grants of the German Research Council to BE, TP, AKP  
397 (FOR2722) and BE (RU 2722, project ID 407239409). We thank George Kollias for  
398 providing us hTNFtg mice.

399

## 400 Citations

- 401 1. Lefevre S, Knedla A, Tennie C, Kampmann A, Wunrau C, Dinser R, Korb A, Schnaker  
402 EM, Tarner IH, Robbins PD *et al*: **Synovial fibroblasts spread rheumatoid arthritis to**  
403 **unaffected joints**. *Nat Med* 2009, **15**(12):1414-1420.
- 404 2. Fassbender HG, Simmling-Annefeld M: **The potential aggressiveness of synovial**  
405 **tissue in rheumatoid arthritis**. *The Journal of pathology* 1983, **139**(3):399-406.
- 406 3. Mousavi MJ, Karami J, Aslani S, Tahmasebi MN, Vaziri AS, Jamshidi A, Farhadi E,  
407 Mahmoudi M: **Transformation of fibroblast-like synoviocytes in rheumatoid**  
408 **arthritis; from a friend to foe**. *Autoimmunity Highlights* 2021, **12**(1):3.
- 409 4. Korb-Pap A, Stratis A, Muhlenberg K, Niederreiter B, Hayer S, Echtermeyer F, Stange  
410 R, Zwerina J, Pap T, Pavenstadt H *et al*: **Early structural changes in cartilage and bone**  
411 **are required for the attachment and invasion of inflamed synovial tissue during**  
412 **destructive inflammatory arthritis**. *Ann Rheum Dis* 2012, **71**(6):1004-1011.
- 413 5. Rinaldi N, Schwarz-Eywill M, Weis D, Leppelmann-Jansen P, Lukoschek M, Keilholz U,  
414 Barth T: **Increased expression of integrins on fibroblast-like synoviocytes from**  
415 **rheumatoid arthritis in vitro correlates with enhanced binding to extracellular**  
416 **matrix proteins**. *Annals of the Rheumatic Diseases* 1997, **56**(1):45-51.
- 417 6. Peters MA, Wendholt D, Strietholt S, Frank S, Pundt N, Korb-Pap A, Joosten LA, van  
418 den Berg WB, Kollias G, Eckes B *et al*: **The loss of alpha2beta1 integrin suppresses**  
419 **joint inflammation and cartilage destruction in mouse models of rheumatoid**  
420 **arthritis**. *Arthritis and rheumatism* 2012, **64**(5):1359-1368.
- 421 7. Tiger C-F, Fougereousse F, Grundström G, Velling T, Gullberg D: **α11β1 Integrin Is a**  
422 **Receptor for Interstitial Collagens Involved in Cell Migration and Collagen**

- 423           **Reorganization on Mesenchymal Nonmuscle Cells. *Developmental biology* 2001,  
424           **237(1):116-129.****
- 425    8.    Zhang WM, Kapyla J, Puranen JS, Knight CG, Tiger CF, Pentikainen OT, Johnson MS,  
426    Farndale RW, Heino J, Gullberg D: **alpha 11beta 1 integrin recognizes the GFOGER**  
427    **sequence in interstitial collagens. *J Biol Chem* 2003, **278(9):7270-7277.****
- 428    9.    Gullberg D, Velling T, Sjoberg G, Sejersen T: **Up-regulation of a novel integrin alpha-**  
429    **chain (amt) on human fetal myotubes,** vol. 204; 1995.
- 430    10.   Popova SN, Rodriguez-Sanchez B, Liden A, Betsholtz C, Van Den Bos T, Gullberg D:  
431    **The mesenchymal alpha11beta1 integrin attenuates PDGF-BB-stimulated**  
432    **chemotaxis of embryonic fibroblasts on collagens. *Developmental biology* 2004,  
433    **270(2):427-442.****
- 434    11.   Kaltz N, Ringe J, Holzwarth C, Charbord P, Niemeyer M, Jacobs VR, Peschel C, Haupl T,  
435    Oostendorp RA: **Novel markers of mesenchymal stem cells defined by genome-wide**  
436    **gene expression analysis of stromal cells from different sources. *Exp Cell Res* 2010,  
437    **316(16):2609-2617.****
- 438    12.   Schulz J-N, Zeltz C, Sørensen IW, Barczyk M, Carracedo S, Hallinger R, Niehoff A, Eckes  
439    B, Gullberg D: **Reduced Granulation Tissue and Wound Strength in the Absence of**  
440    **&#x3b1;11&#x3b2;1 Integrin. *Journal of Investigative Dermatology* 2015,  
441    **135(5):1435-1444.****
- 442    13.   Barczyk MM, Lu N, Popova SN, Bolstad AI, Gullberg D: **alpha11beta1 integrin-**  
443    **mediated MMP-13-dependent collagen lattice contraction by fibroblasts: evidence**  
444    **for integrin-coordinated collagen proteolysis. *Journal of cellular physiology* 2013,  
445    **228(5):1108-1119.****

- 446 14. Vuoristo M, Vihinen P, Vlaykova T, Nylund C, Heino J, Pyrhonen S: **Increased gene**  
447 **expression levels of collagen receptor integrins are associated with decreased**  
448 **survival parameters in patients with advanced melanoma.** *Melanoma research*  
449 2007, **17**(4):215-223.
- 450 15. Navab R, Strumpf D, To C, Pasko E, Kim KS, Park CJ, Hai J, Liu J, Jonkman J, Barczyk M  
451 *et al*: **Integrin alpha11beta1 regulates cancer stromal stiffness and promotes**  
452 **tumorigenicity and metastasis in non-small cell lung cancer.** *Oncogene* 2016,  
453 **35**(15):1899-1908.
- 454 16. Zhu C-Q, Popova SN, Brown ERS, Barsyte-Lovejoy D, Navab R, Shih W, Li M, Lu M,  
455 Jurisica I, Penn LZ *et al*: **Integrin  $\alpha$ 11 regulates IGF2 expression in fibroblasts to**  
456 **enhance tumorigenicity of human non-small-cell lung cancer cells.** *Proceedings of*  
457 *the National Academy of Sciences of the United States of America* 2007,  
458 **104**(28):11754-11759.
- 459 17. Arnett FC, Edworthy SM, Bloch DA, McShane DJ, Fries JF, Cooper NS, Healey LA,  
460 Kaplan SR, Liang MH, Luthra HS *et al*: **The American Rheumatism Association 1987**  
461 **revised criteria for the classification of rheumatoid arthritis.** *Arthritis and*  
462 *rheumatism* 1988, **31**(3):315-324.
- 463 18. Keffer J, Probert L, Cazlaris H, Georgopoulos S, Kaslaris E, Kioussis D, Kollias G:  
464 **Transgenic mice expressing human tumour necrosis factor: a predictive genetic**  
465 **model of arthritis.** *The EMBO Journal* 1991, **10**(13):4025-4031.
- 466 19. Popova SN, Barczyk M, Tiger CF, Beertsen W, Zigrino P, Aszodi A, Miosge N, Forsberg  
467 E, Gullberg D: **Alpha11 beta1 integrin-dependent regulation of periodontal ligament**  
468 **function in the erupting mouse incisor.** *Mol Cell Biol* 2007, **27**(12):4306-4316.

- 469 20. Redlich K, Hayer S, Ricci R, David JP, Tohidast-Akrad M, Kollias G, Steiner G, Smolen  
470 JS, Wagner EF, Schett G: **Osteoclasts are essential for TNF-alpha-mediated joint**  
471 **destruction**. *The Journal of clinical investigation* 2002, **110**(10):1419-1427.
- 472 21. Zeltz C, Alam J, Liu H, Erusappan PM, Hoschuetzky H, Molven A, Parajuli H, Cukierman  
473 E, Costea DE, Lu N *et al*:  **$\alpha$ 11 $\beta$ 1 Integrin is Induced in a Subset of Cancer-Associated**  
474 **Fibroblasts in Desmoplastic Tumor Stroma and Mediates In Vitro Cell Migration**.  
475 *Cancers (Basel)* 2019, **11**(6).
- 476 22. Leomil Coelho LF, Mota BE, Sales PC, Marques JT, de Oliveira JG, Bonjardim CA,  
477 Peregrino Ferreira PC, Kroon EG: **Integrin alpha 11 is a novel type I interferon**  
478 **stimulated gene**. *Cytokine* 2006, **33**(6):352-361.
- 479 23. Muskardin TLW, Niewold TB: **Type I interferon in rheumatic diseases**. *Nat Rev*  
480 *Rheumatol* 2018, **14**(4):214-228.
- 481 24. Bira Y, Tani K, Nishioka Y, Miyata J, Sato K, Hayashi A, Nakaya Y, Sone S: **Transforming**  
482 **growth factor beta stimulates rheumatoid synovial fibroblasts via the type II**  
483 **receptor**. *Mod Rheumatol* 2005, **15**(2):108-113.
- 484 25. Lu N, Carracedo S, Ranta J, Heuchel R, Soininen R, Gullberg D: **The human alpha11**  
485 **integrin promoter drives fibroblast-restricted expression in vivo and is regulated by**  
486 **TGF-beta1 in a Smad- and Sp1-dependent manner**. *Matrix biology : journal of the*  
487 *International Society for Matrix Biology* 2010, **29**(3):166-176.
- 488 26. Zeltz C, Gullberg D. **Post-translational modifications of integrin ligands as**  
489 **pathogenic mechanisms in disease**. *Matrix Biol.* 2014, **40**:5-9.
- 490 27. Sipilä K, Haag S, Denessiouk K, Käpylä J, Peters EC, Denesyuk A, Hansen U, Konttinen  
491 Y, Johnson MS, Holmdahl R *et al*: **Citrullination of collagen II affects integrin-**

- 492            **mediated cell adhesion in a receptor-specific manner.** *The FASEB Journal* 2014,  
493            **28(8):3758-3768.**
- 494    28.    Lowin T, Straub RH: **Integrins and their ligands in rheumatoid arthritis.** *Arthritis Res*  
495            *Ther* 2011, **13(5):244.**
- 496    29.    Popov C, Radic T, Haasters F, Prall WC, Aszodi A, Gullberg D, Schieker M, Docheva D:  
497            **Integrins alpha2beta1 and alpha11beta1 regulate the survival of mesenchymal**  
498            **stem cells on collagen I.** *Cell Death Dis* 2011, **2:e186.**
- 499    30.    Erusappan P, Alam J, Lu N, Zeltz C, Gullberg D: **Integrin  $\alpha$ 11 cytoplasmic tail is**  
500            **required for FAK activation to initiate 3D cell invasion and ERK-mediated cell**  
501            **proliferation.** *Scientific Reports* 2019, **9(1):15283.**
- 502    31.    Müller-Ladner U, Kriegsmann J, Franklin BN, Matsumoto S, Geiler T, Gay RE, Gay S:  
503            **Synovial fibroblasts of patients with rheumatoid arthritis attach to and invade**  
504            **normal human cartilage when engrafted into SCID mice.** *The American Journal of*  
505            *Pathology* 1996, **149(5):1607-1615.**
- 506    32.    Pap T, Claus A, Ohtsu S, Hummel KM, Schwartz P, Drynda S, Pap G, Machner A, Stein  
507            B, George M *et al*: **Osteoclast-independent bone resorption by fibroblast-like cells.**  
508            *Arthritis Res Ther* 2003, **5(3):R163-173.**
- 509    33.    Tanaka S: **Regulation of bone destruction in rheumatoid arthritis through RANKL-**  
510            **RANK pathways.** *World J Orthop* 2013, **4(1):1-6.**
- 511    34.    Takayanagi H, Oda H, Yamamoto S, Kawaguchi H, Tanaka S, Nishikawa T, Koshihara Y:  
512            **A new mechanism of bone destruction in rheumatoid arthritis: synovial fibroblasts**  
513            **induce osteoclastogenesis.** *Biochemical and biophysical research communications*  
514            1997, **240(2):279-286.**



- 515 35. Shen B, Vardy K, Hughes P, Tasdogan A, Zhao Z, Yue R, Crane GM, Morrison SJ.  
516 Integrin alpha11 is an Ostelectin receptor and is required for the maintenance of  
517 adult skeletal bone mass. *Elife*. 2019, **8**:e42274.
- 518 36. Hamidi H, Pietilä M, Ivaska J: **The complexity of integrins in cancer and new scopes**  
519 **for therapeutic targeting**. *Br J Cancer* 2016, **115**(9):1017-1023.
- 520 37. Wilder RL: **Integrin alpha V beta 3 as a target for treatment of rheumatoid arthritis**  
521 **and related rheumatic diseases**. *Ann Rheum Dis* 2002, **61 Suppl 2**(Suppl 2):ii96-99.  
522  
523

524 Tables and Figures

525

526 **Figure 1. Expression of integrin  $\alpha 11\beta 1$  in inflammatory arthritis.** Left side:

527 Human tissue of OA and RA patients (n =5). Right side: Murine tissue of wt and

528 hTNFtg mice (n =4). **a)** Immunohistochemistry stainings using specific antibodies

529 against integrin  $\alpha 11\beta 1$  visualized by DAB. **b)** Immunofluorescence of FLS using

530 specific antibodies against integrin  $\alpha 11\beta 1$  (green), F-Actin was visualized by

531 rhodamine phalloidin (red) and nuclei by DAPI (blue) (error bars = 10  $\mu$ m). **c)**

532 Western blot analysis of integrin  $\alpha 11\beta 1$  using specific antibodies against integrin  $\alpha 11\beta 1$

533 expression in FLS, GAPDH served as loading control. **d)** Immunogold-labelling of

534 integrin  $\alpha 11\beta 1$  in wt and hTNFtg FLS co-cultivated with cartilage explants derived

535 from murine femoral head.

536

537 **Figure 2. Effects of *itga11* knockout in hTNFtg mice.** **a)** Clinical scoring of grip

538 strength and paw swelling as surrogate parameters for inflammatory arthritis, as

539 previously described [6] were assessed on a weekly basis (n  $\geq$  5). *Itga11*<sup>-/-</sup>hTNFtg

540 mice displayed reduced severity of symptoms in comparison to hTNFtg mice from

541 weeks nine to twelve. **b)**  $\mu$ CT imaging of hind paws showed less bone destruction in

542 *itga11*<sup>-/-</sup>hTNFtg in comparison to hTNFtg mice at 12 weeks of age. **c)** Quantification

543 of  $\mu$ CT imaging revealed higher residual bone volume of the second and third tarsal

544 bone at twelve weeks of age in *itga11*<sup>-/-</sup>hTNFtg mice (+6.98% vs. hTNFtg, p < 0.005,

545 two-tailed Mann–Whitney U test, n  $\geq$  5). **d)** H&E, Toluidine-blue and TRAP stainings

546 were performed in decalcified, paraffin-embedded hind paws to visualize

547 pathomorphological changes. *Itga11*<sup>-/-</sup>hTNFtg mice displayed visibly less joint

548 destruction compared to hTNFtg mice. **e)** Histomorphological quantifications of

549 Toluidine-blue stainings were performed in a blinded manner (n  $\geq$  5 animals per

550 genotype). *Itga11*<sup>-/-</sup>hTNFtg mice displayed significantly more cartilage area (+2.02 %

551 vs. hTNFtg,  $p < 0.05$ , two-tailed Mann–Whitney U test,  $n \geq 5$ ), less destained  
552 cartilage area (-16.08 % vs. hTNFtg,  $p < 0.05$ , two-tailed Mann–Whitney U test,  $n \geq$   
553 5) and reduction in length of synovial attachment to cartilage surface (-806  $\mu\text{m}$  vs.  
554 hTNFtg,  $p < 0.05$ , two-tailed Mann–Whitney U test,  $n \geq 5$ ), as markers for cartilage  
555 destruction. No significant differences between *Itga11*<sup>-/-</sup>hTNFtg and hTNFtg were  
556 found in the inflammation area (vs. hTNFtg,  $p > 0.05$ , two-tailed Mann–Whitney U  
557 test,  $n \geq 5$ ).

558

559

560



**a**

OA

RA

wild type

hTNFtg

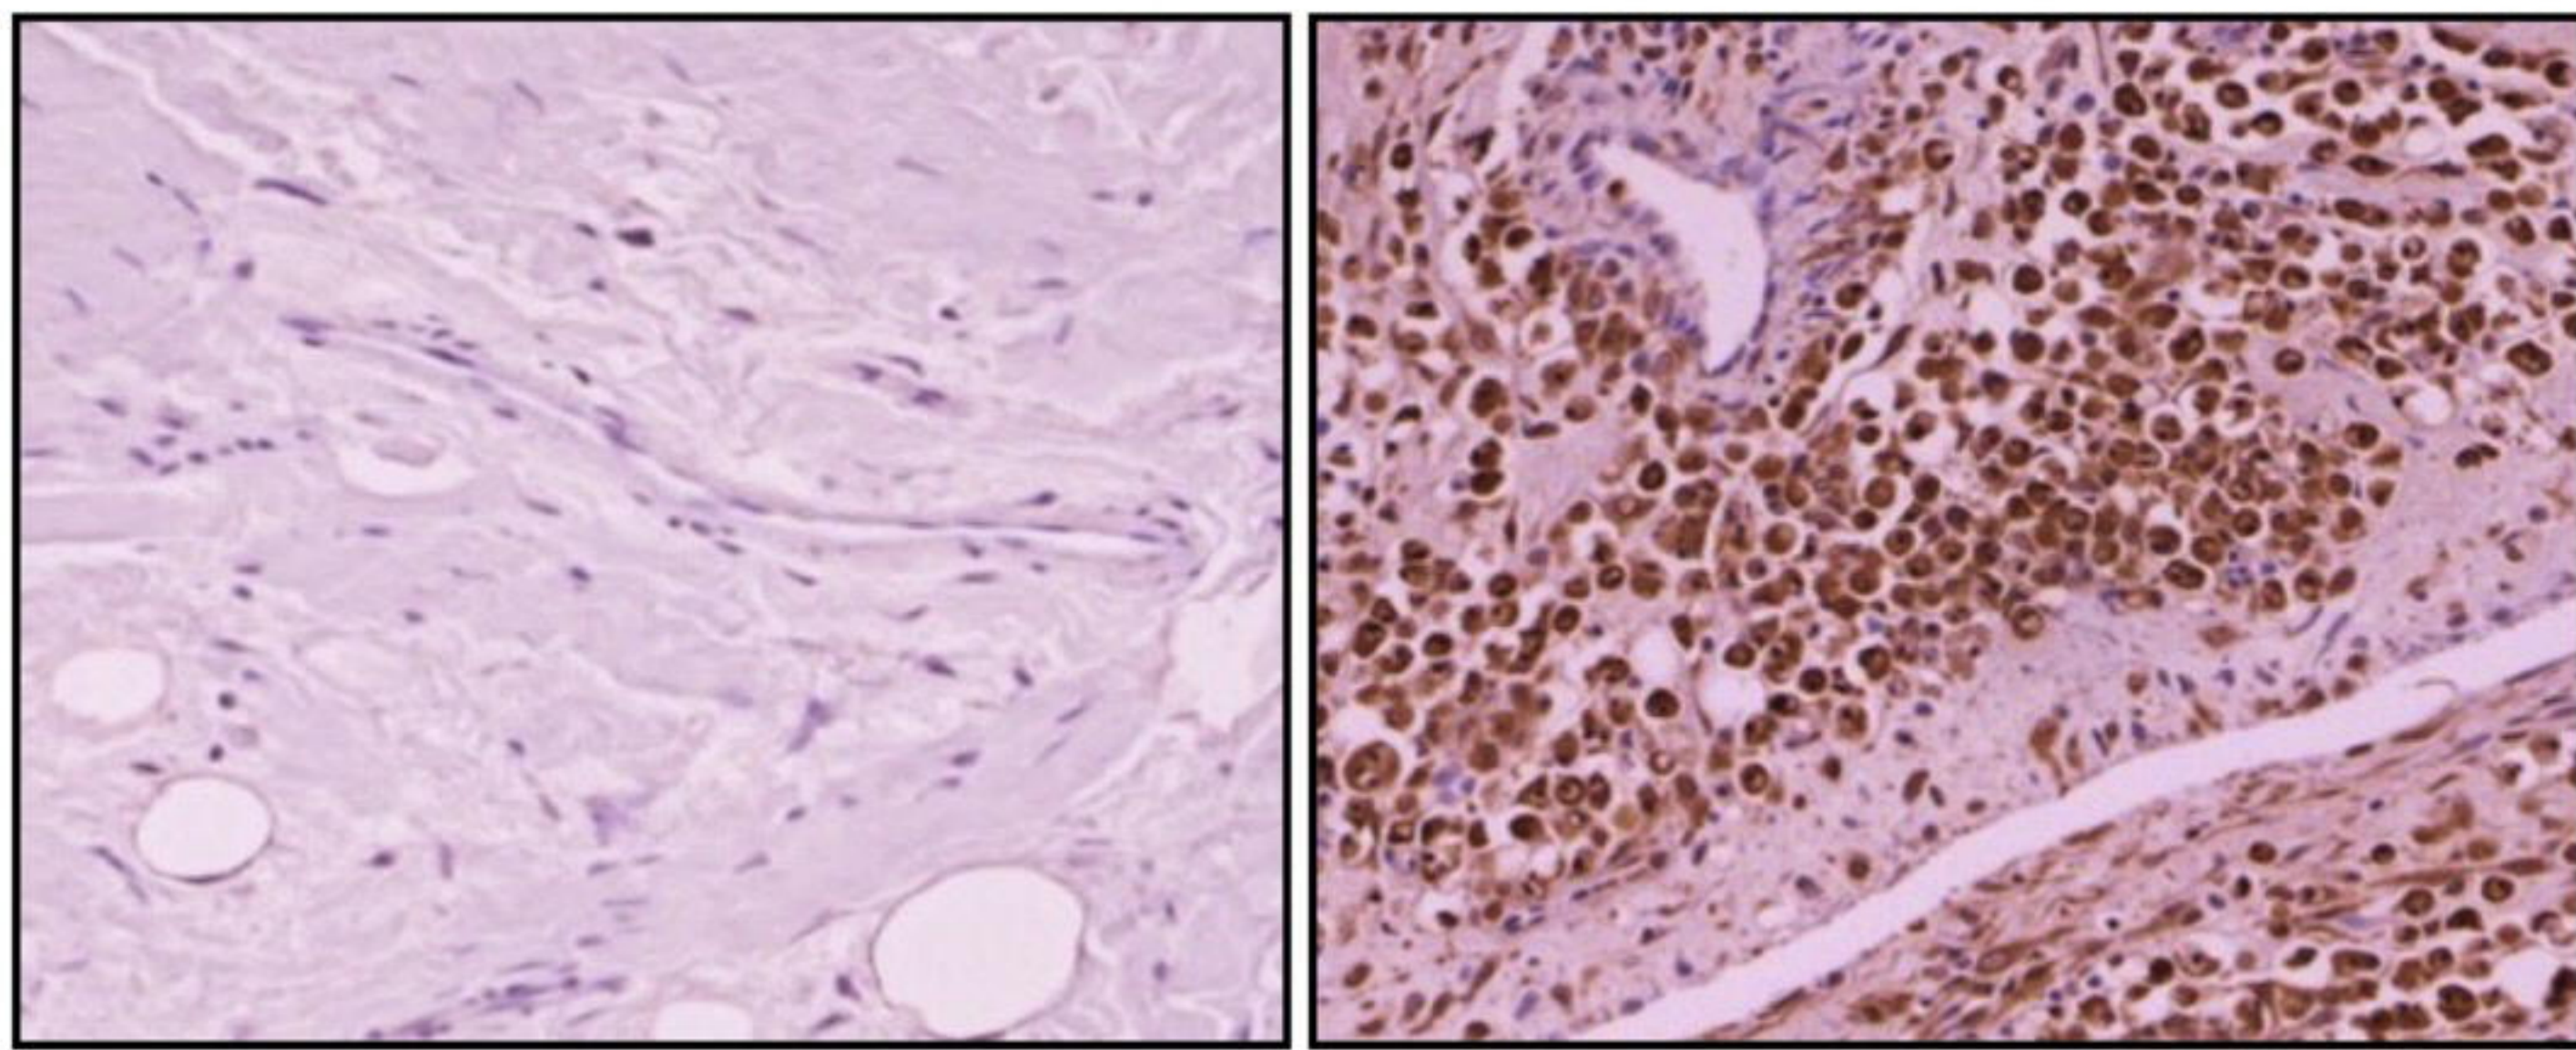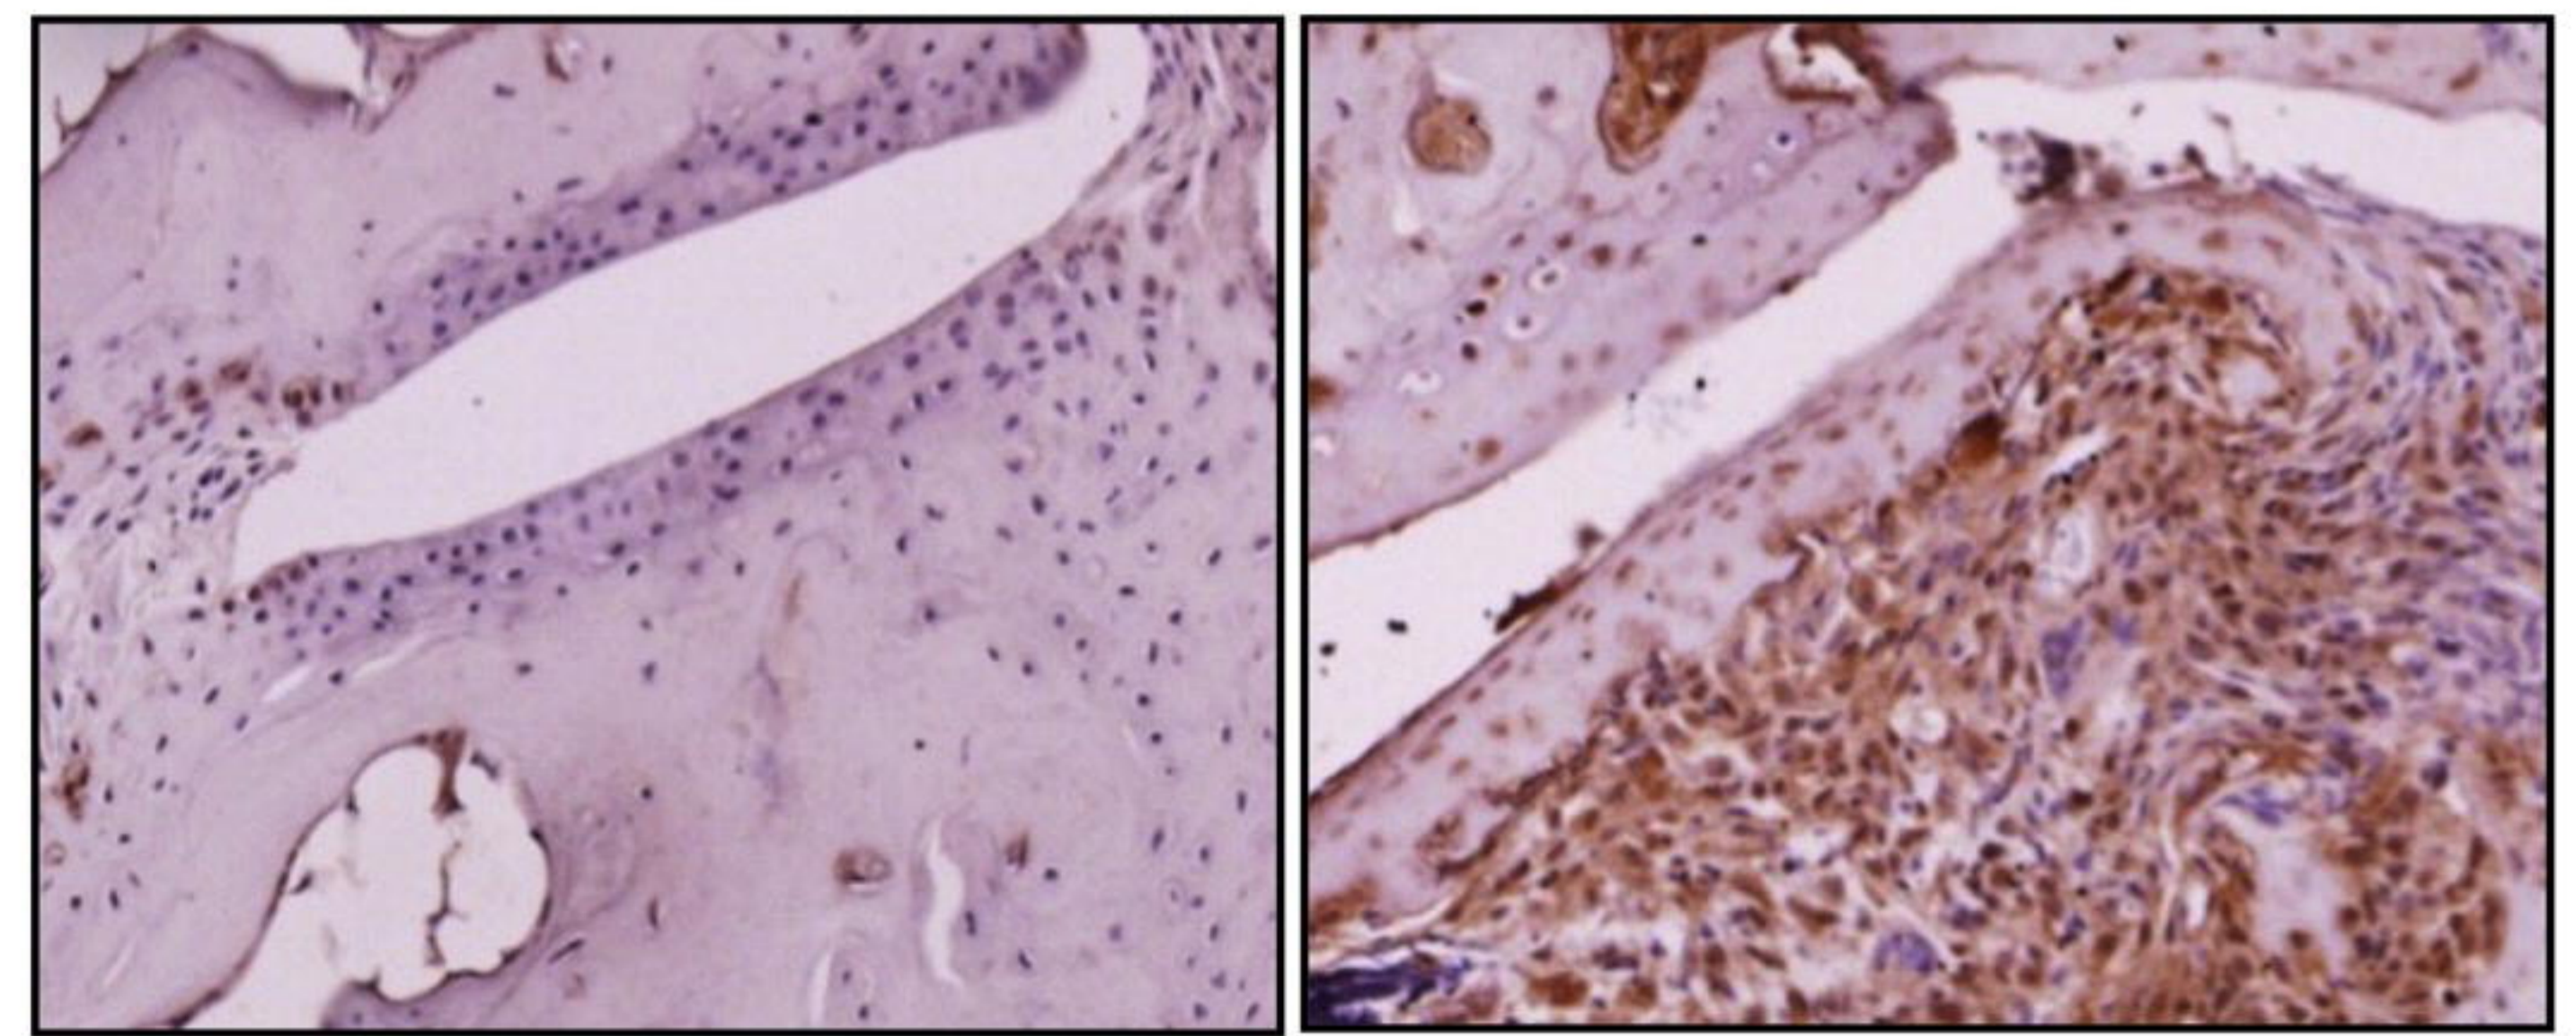**b**

OA-FLS

RA-FLS

wild type FLS

hTNFtg FLS

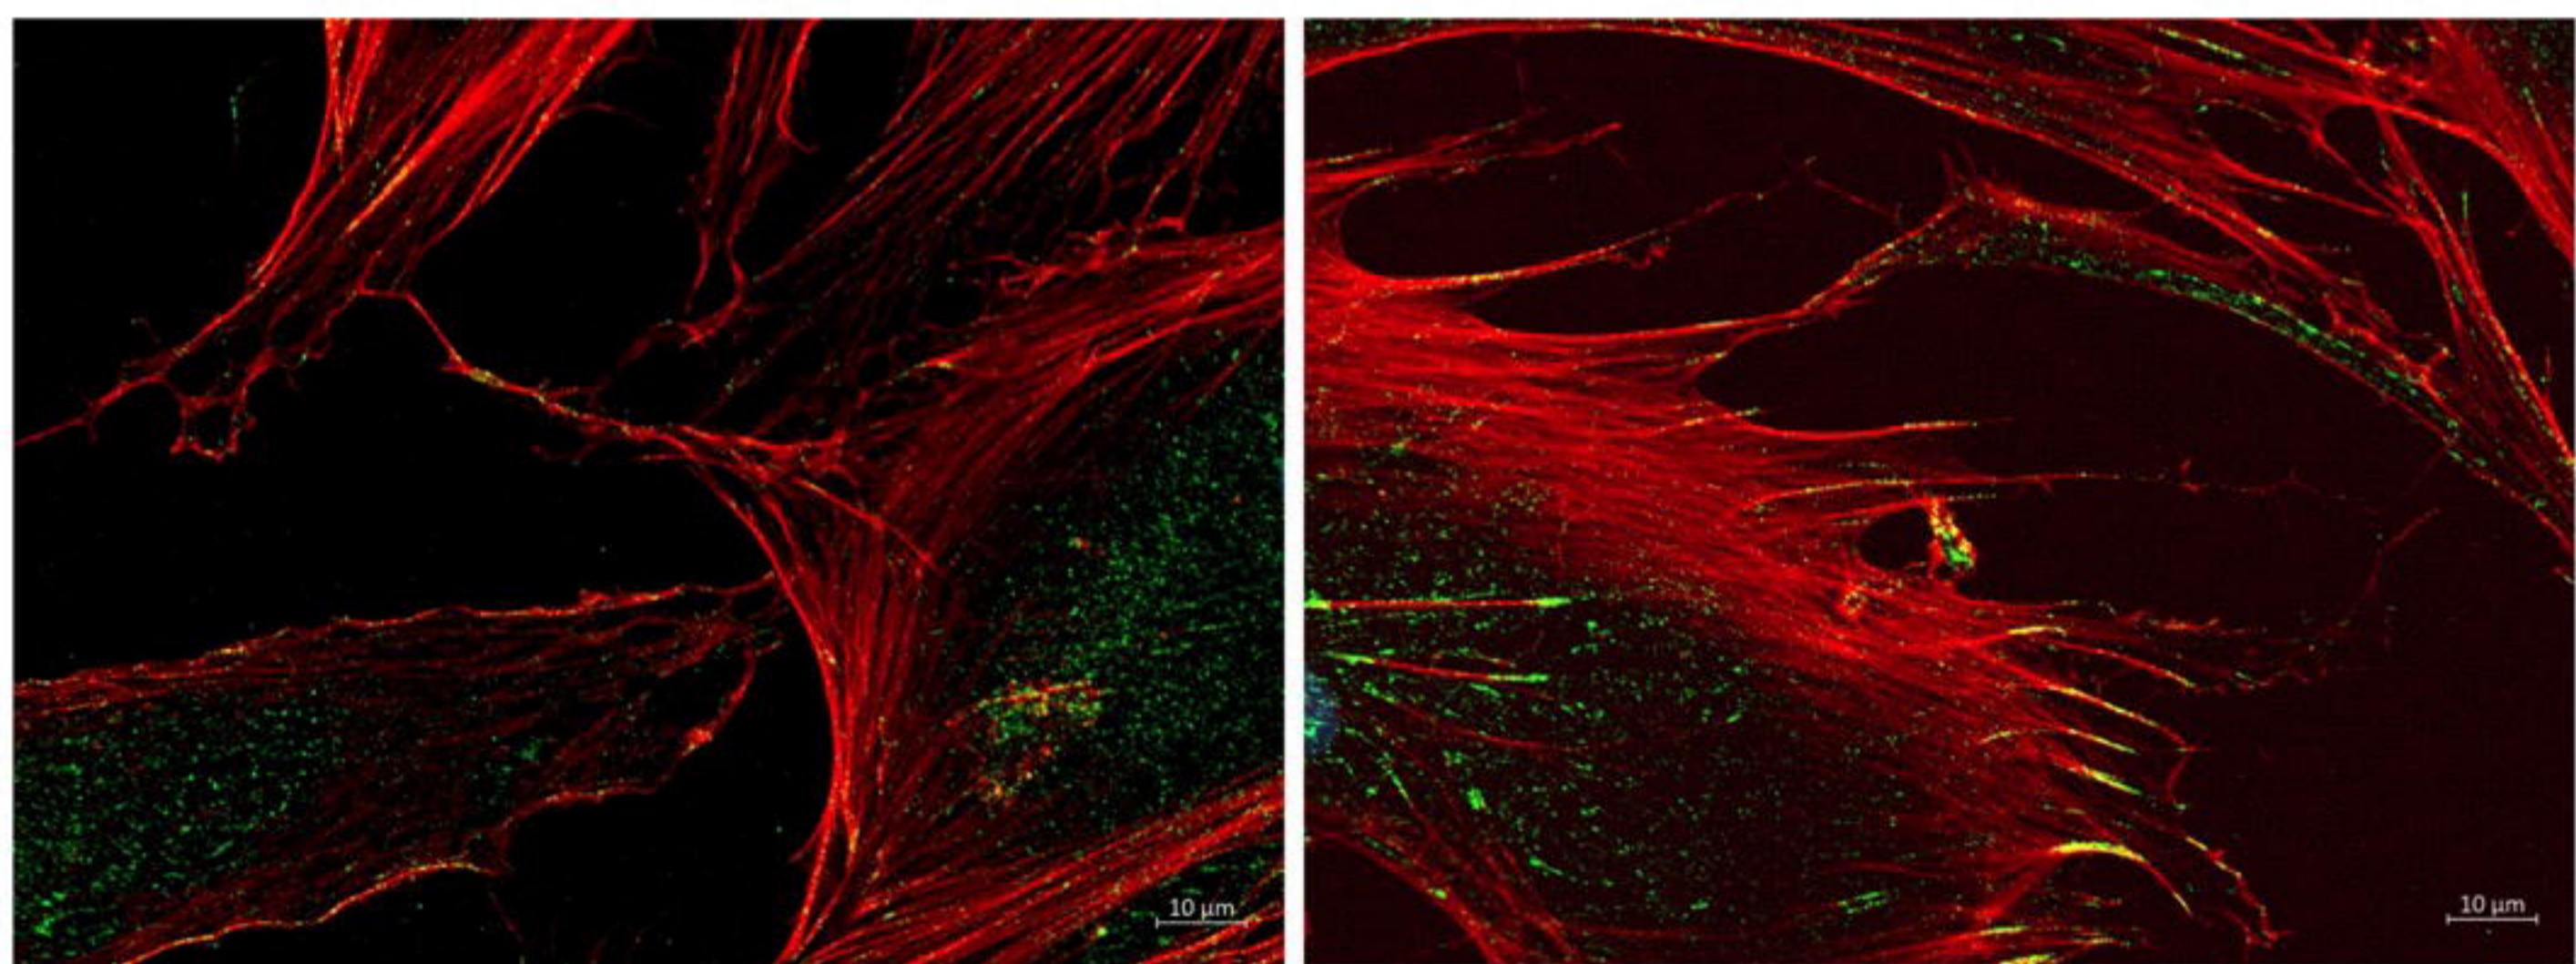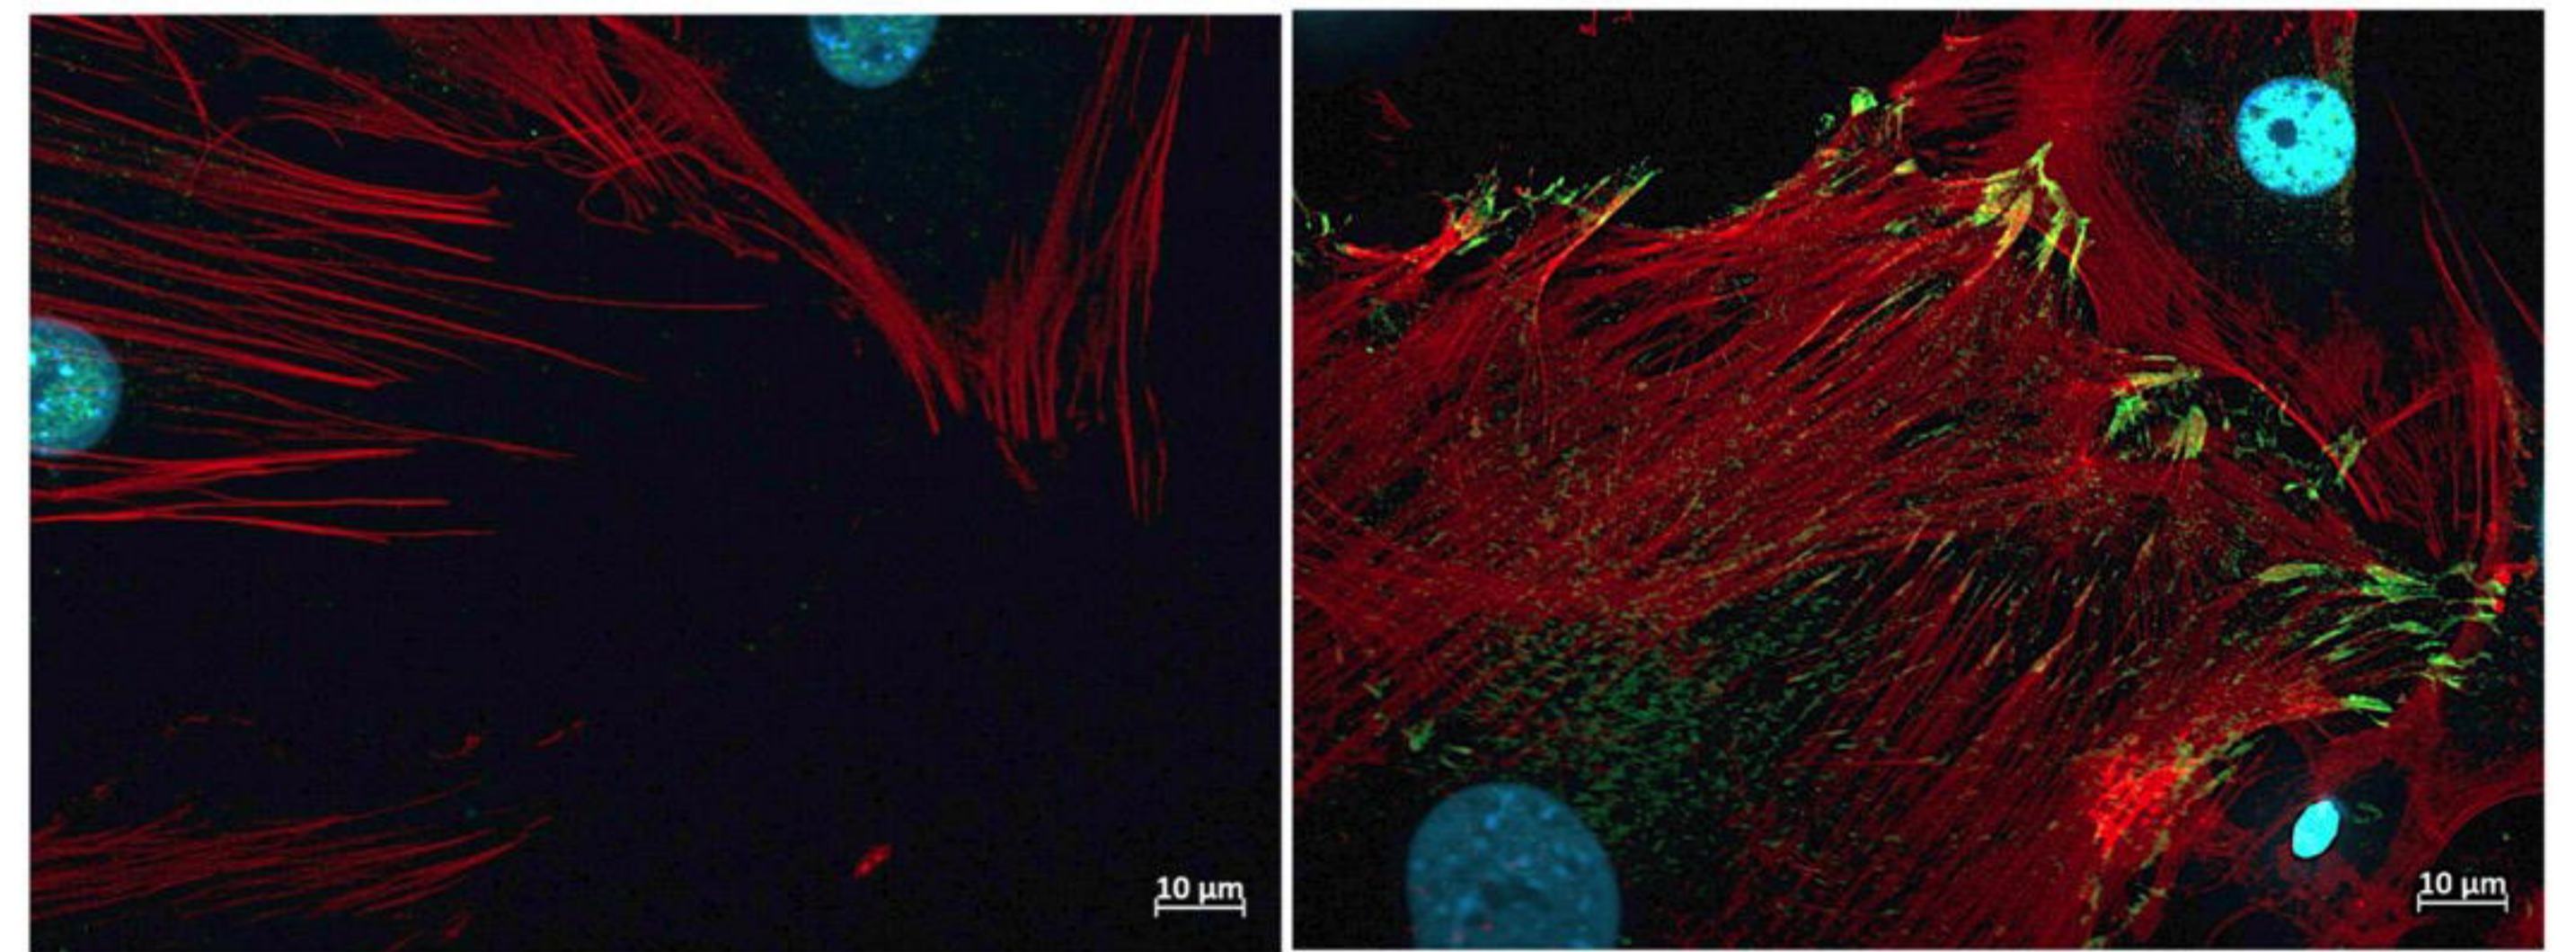**c**

OA-FLS

RA-FLS

 $\alpha 1$ 

1

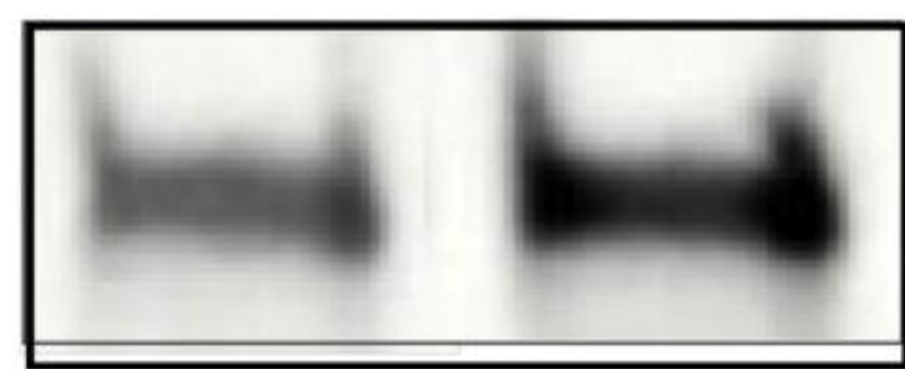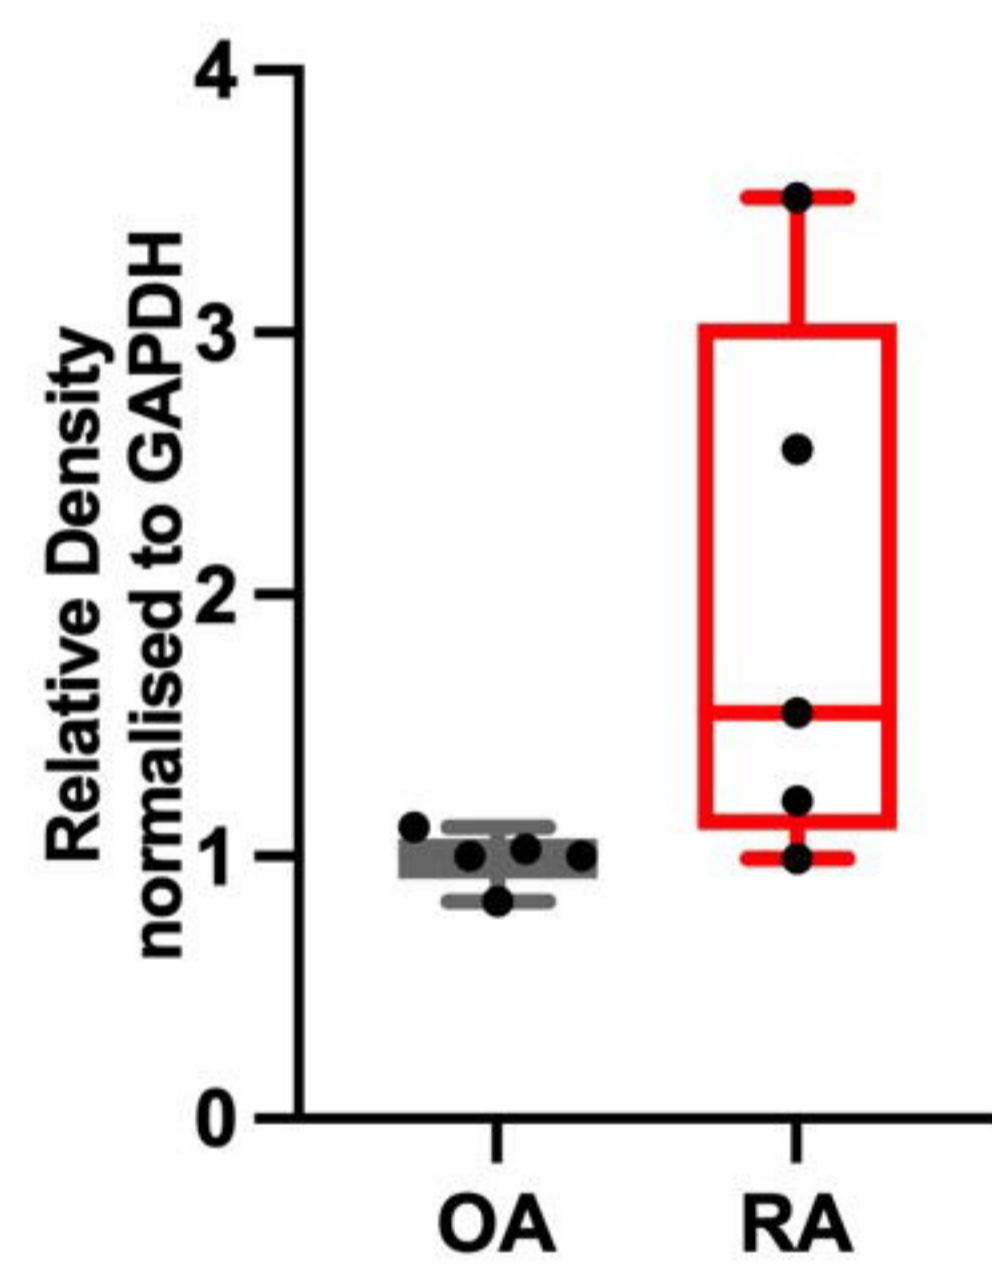

wt FLS

hTNFtg FLS

 $\alpha 1$ 

1

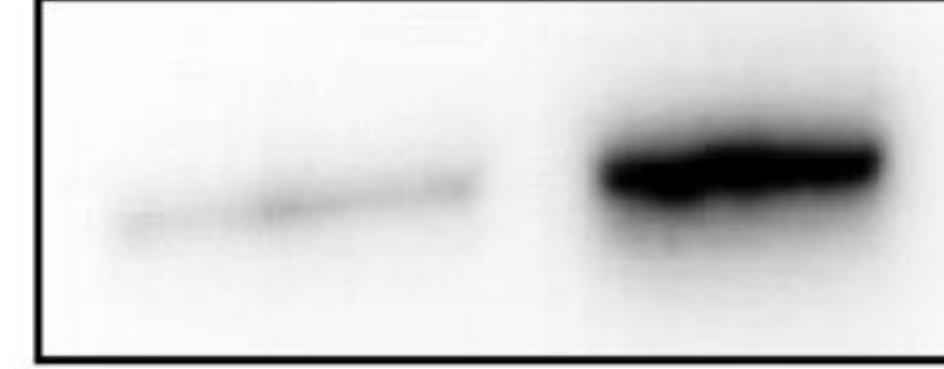

GAPDH

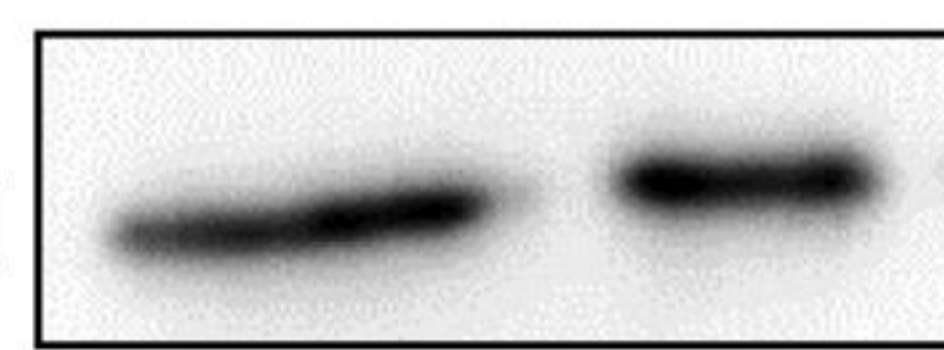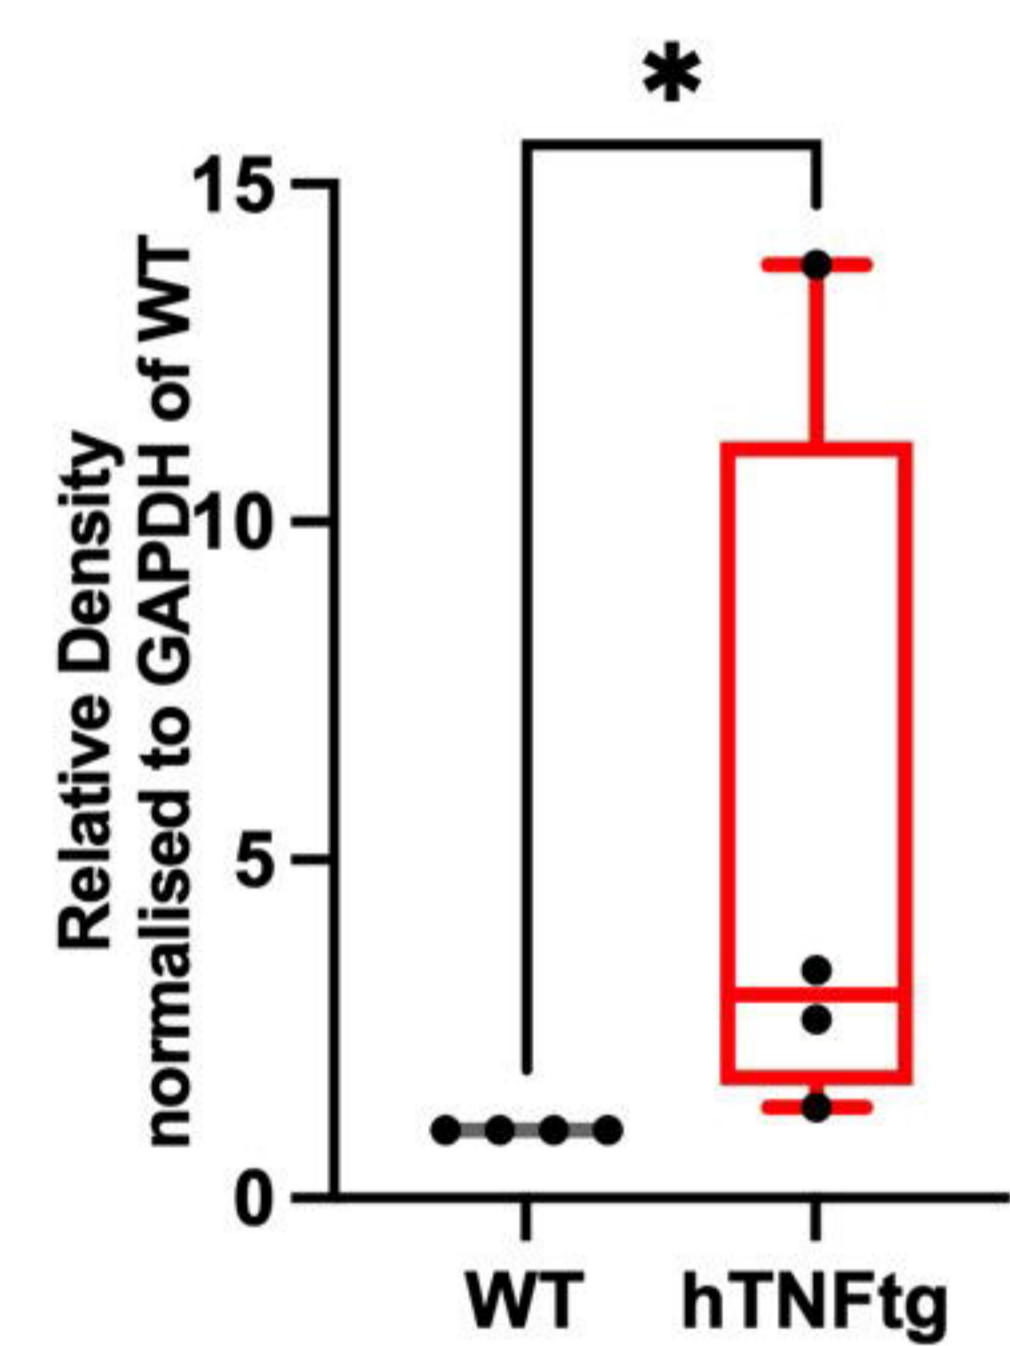**d**

wild type FLS

hTNFtg FLS

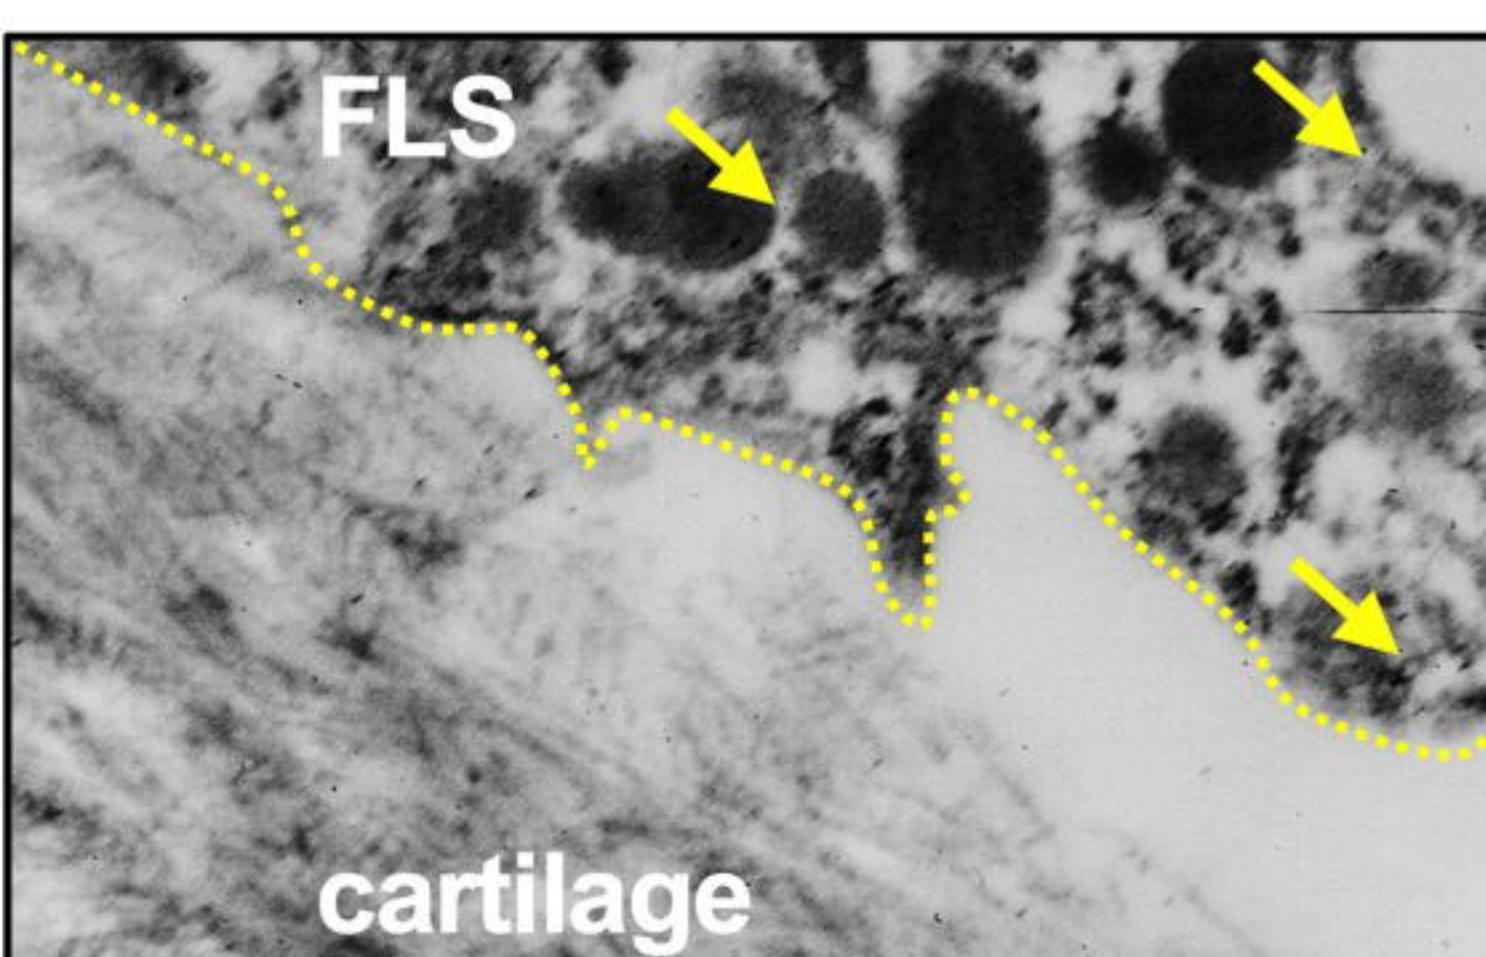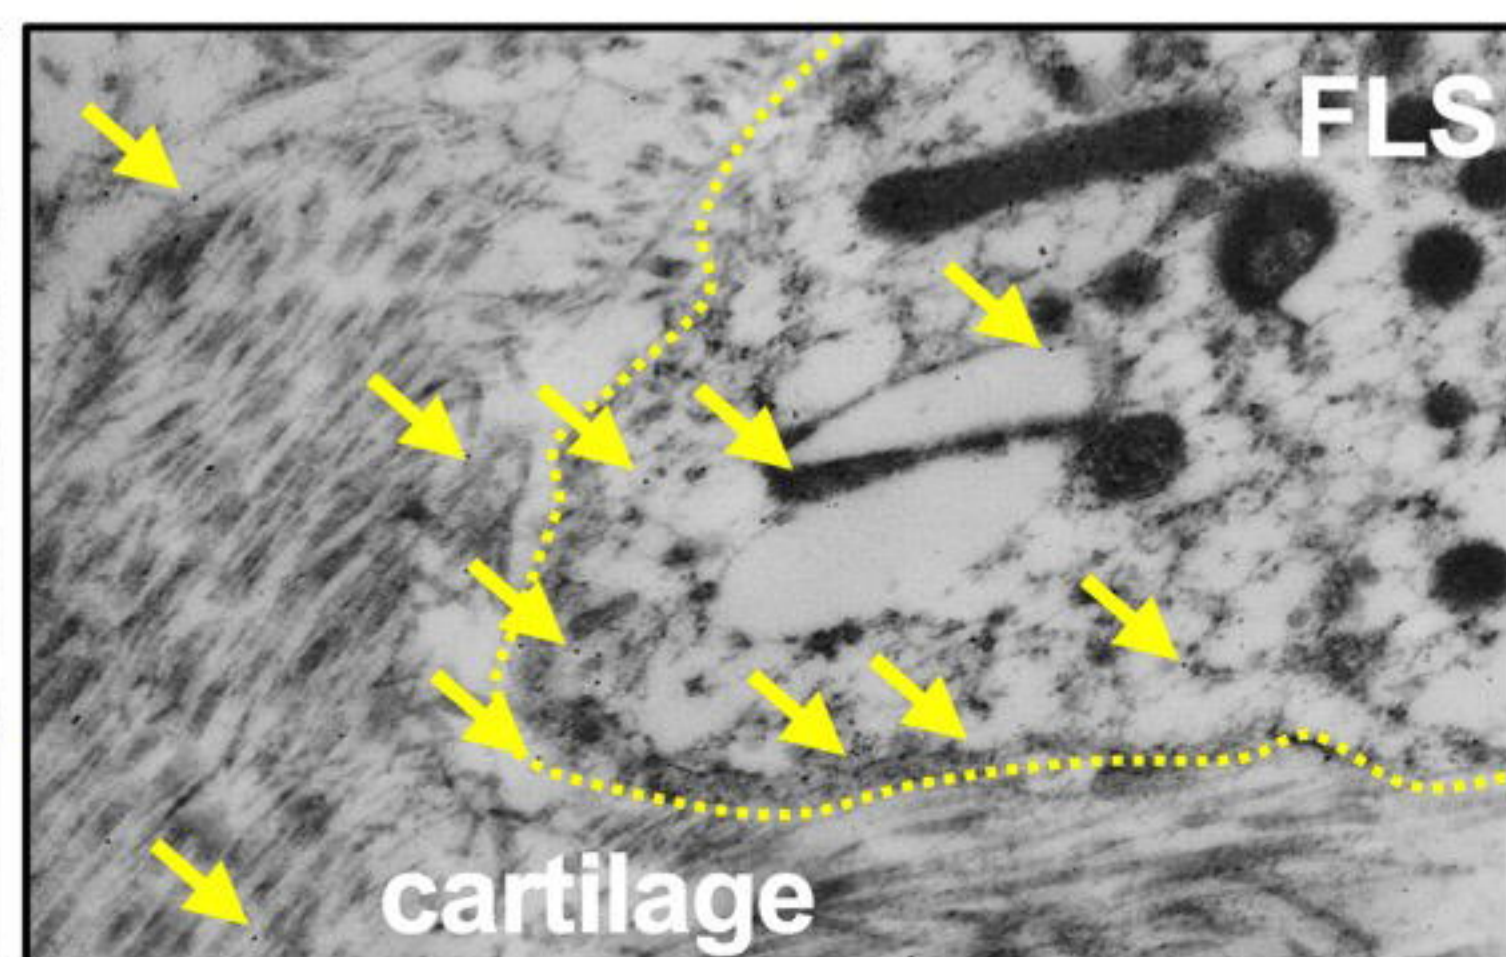



**a**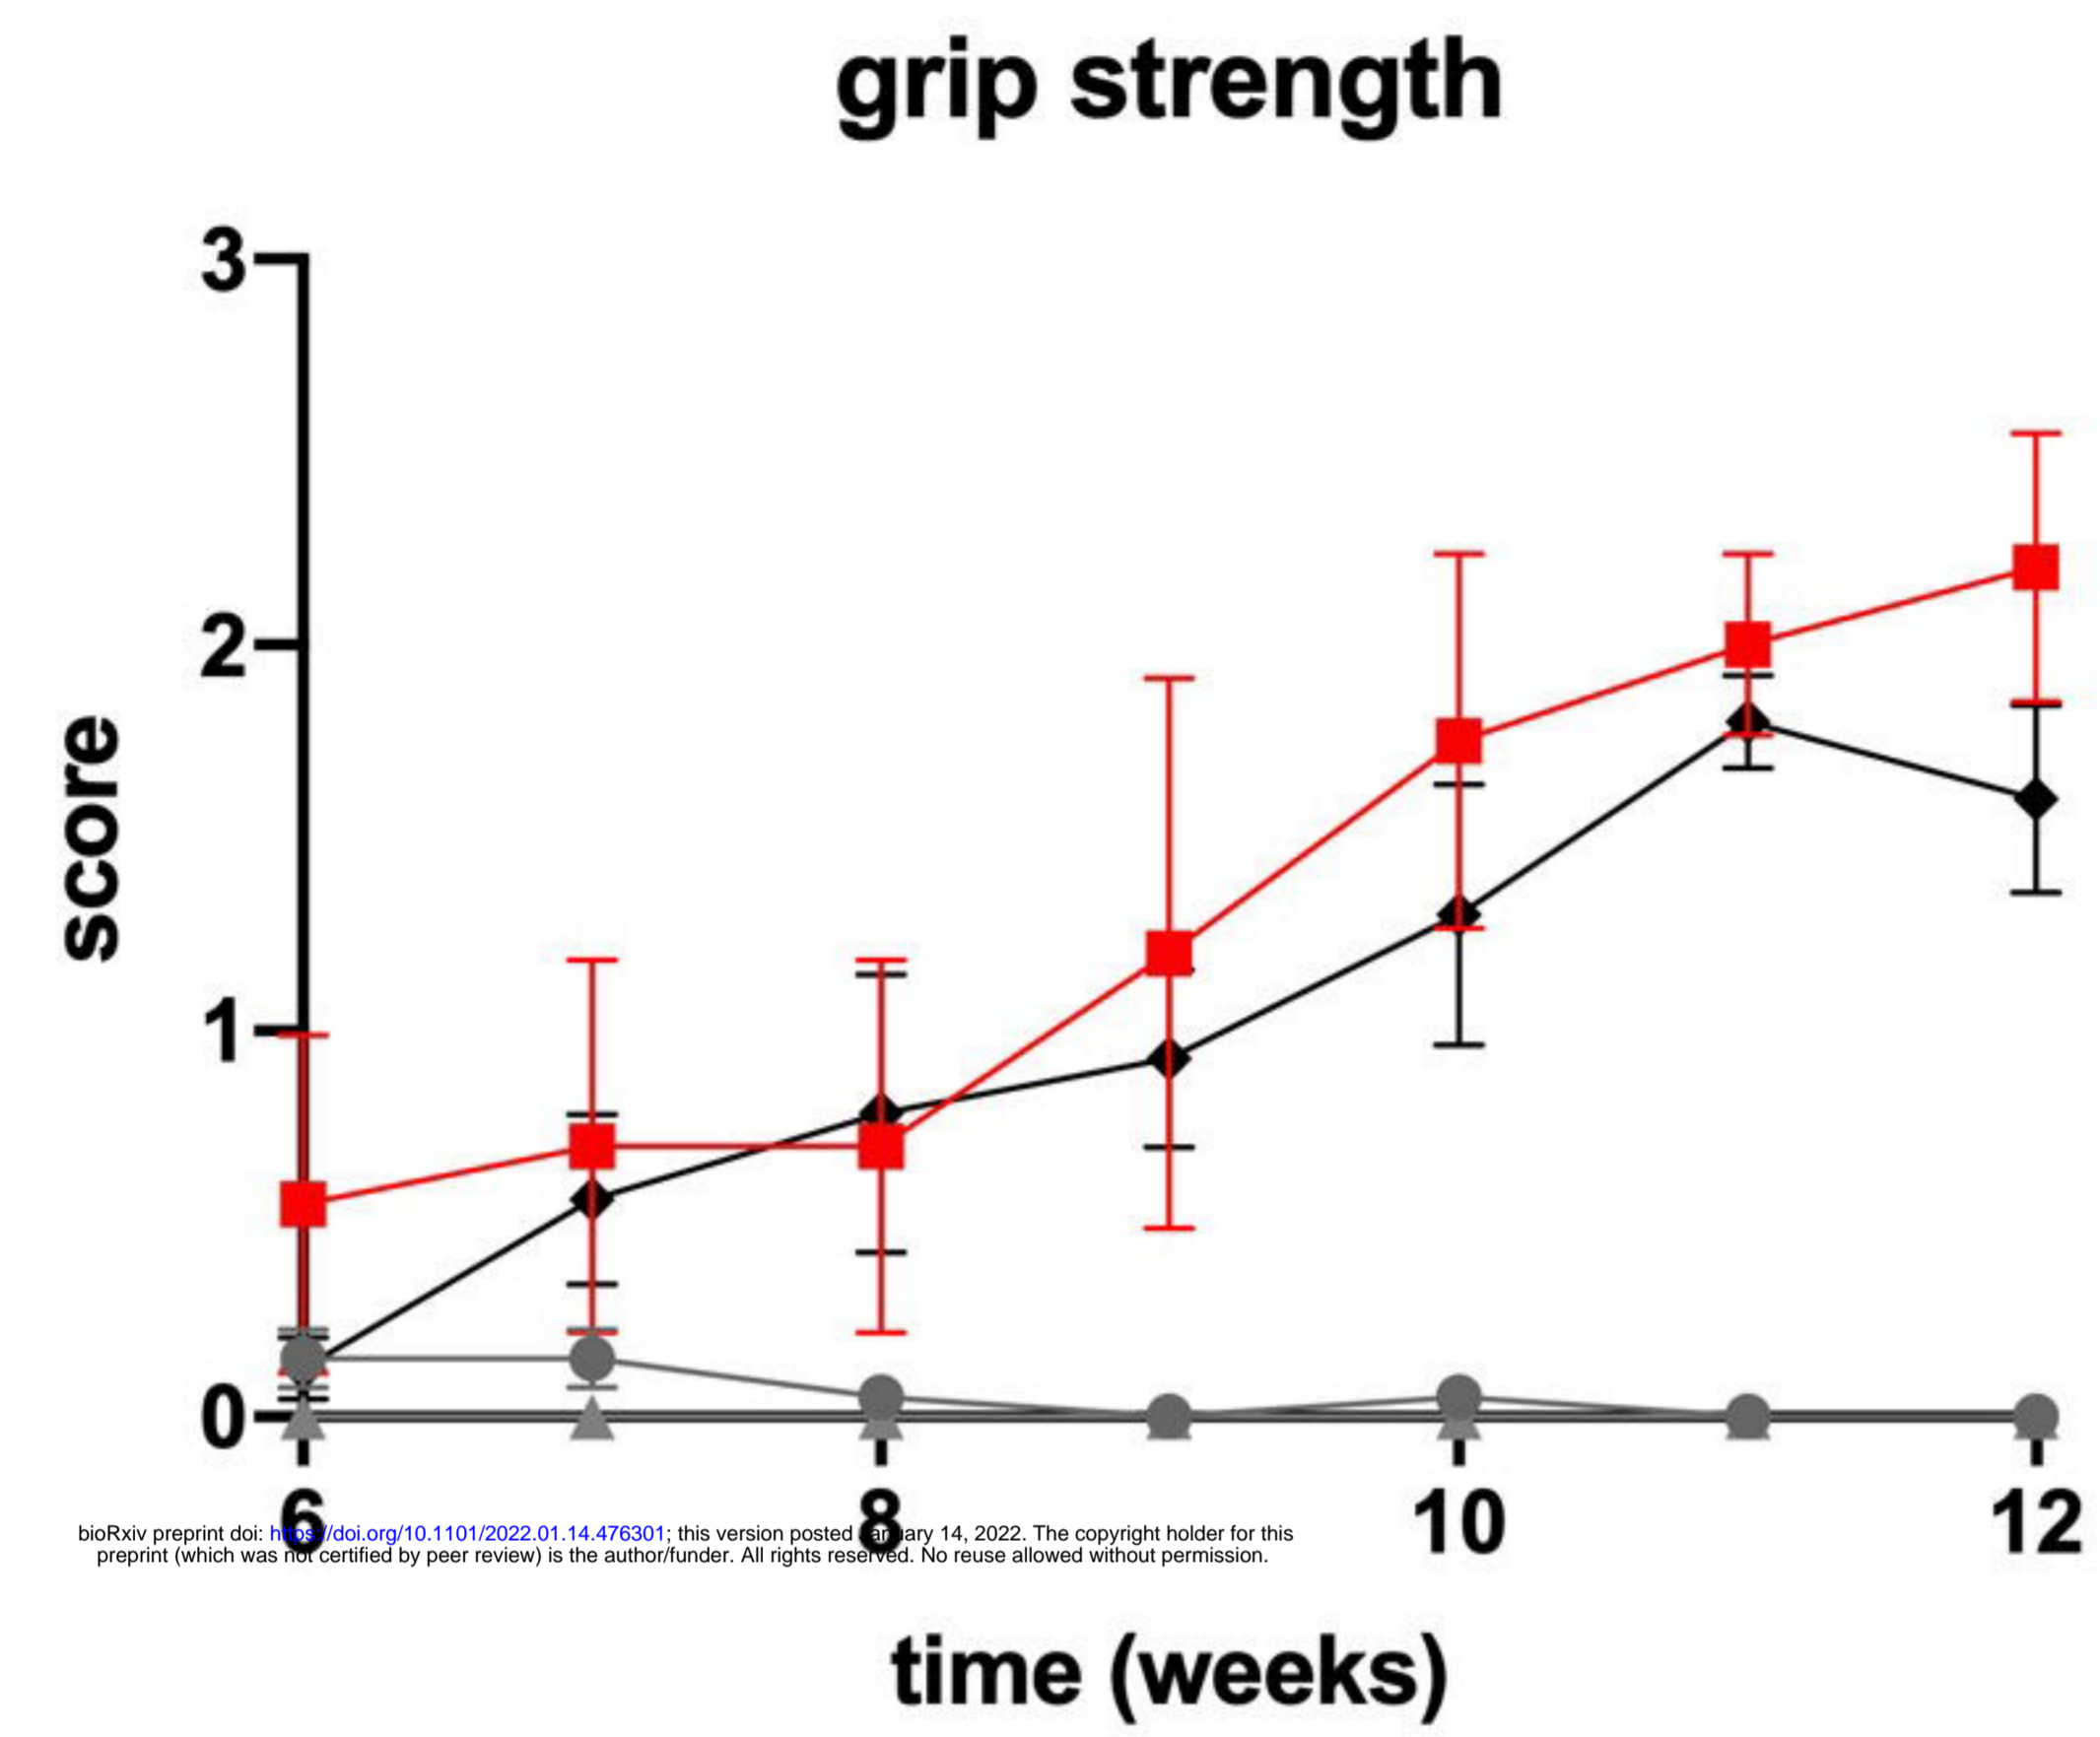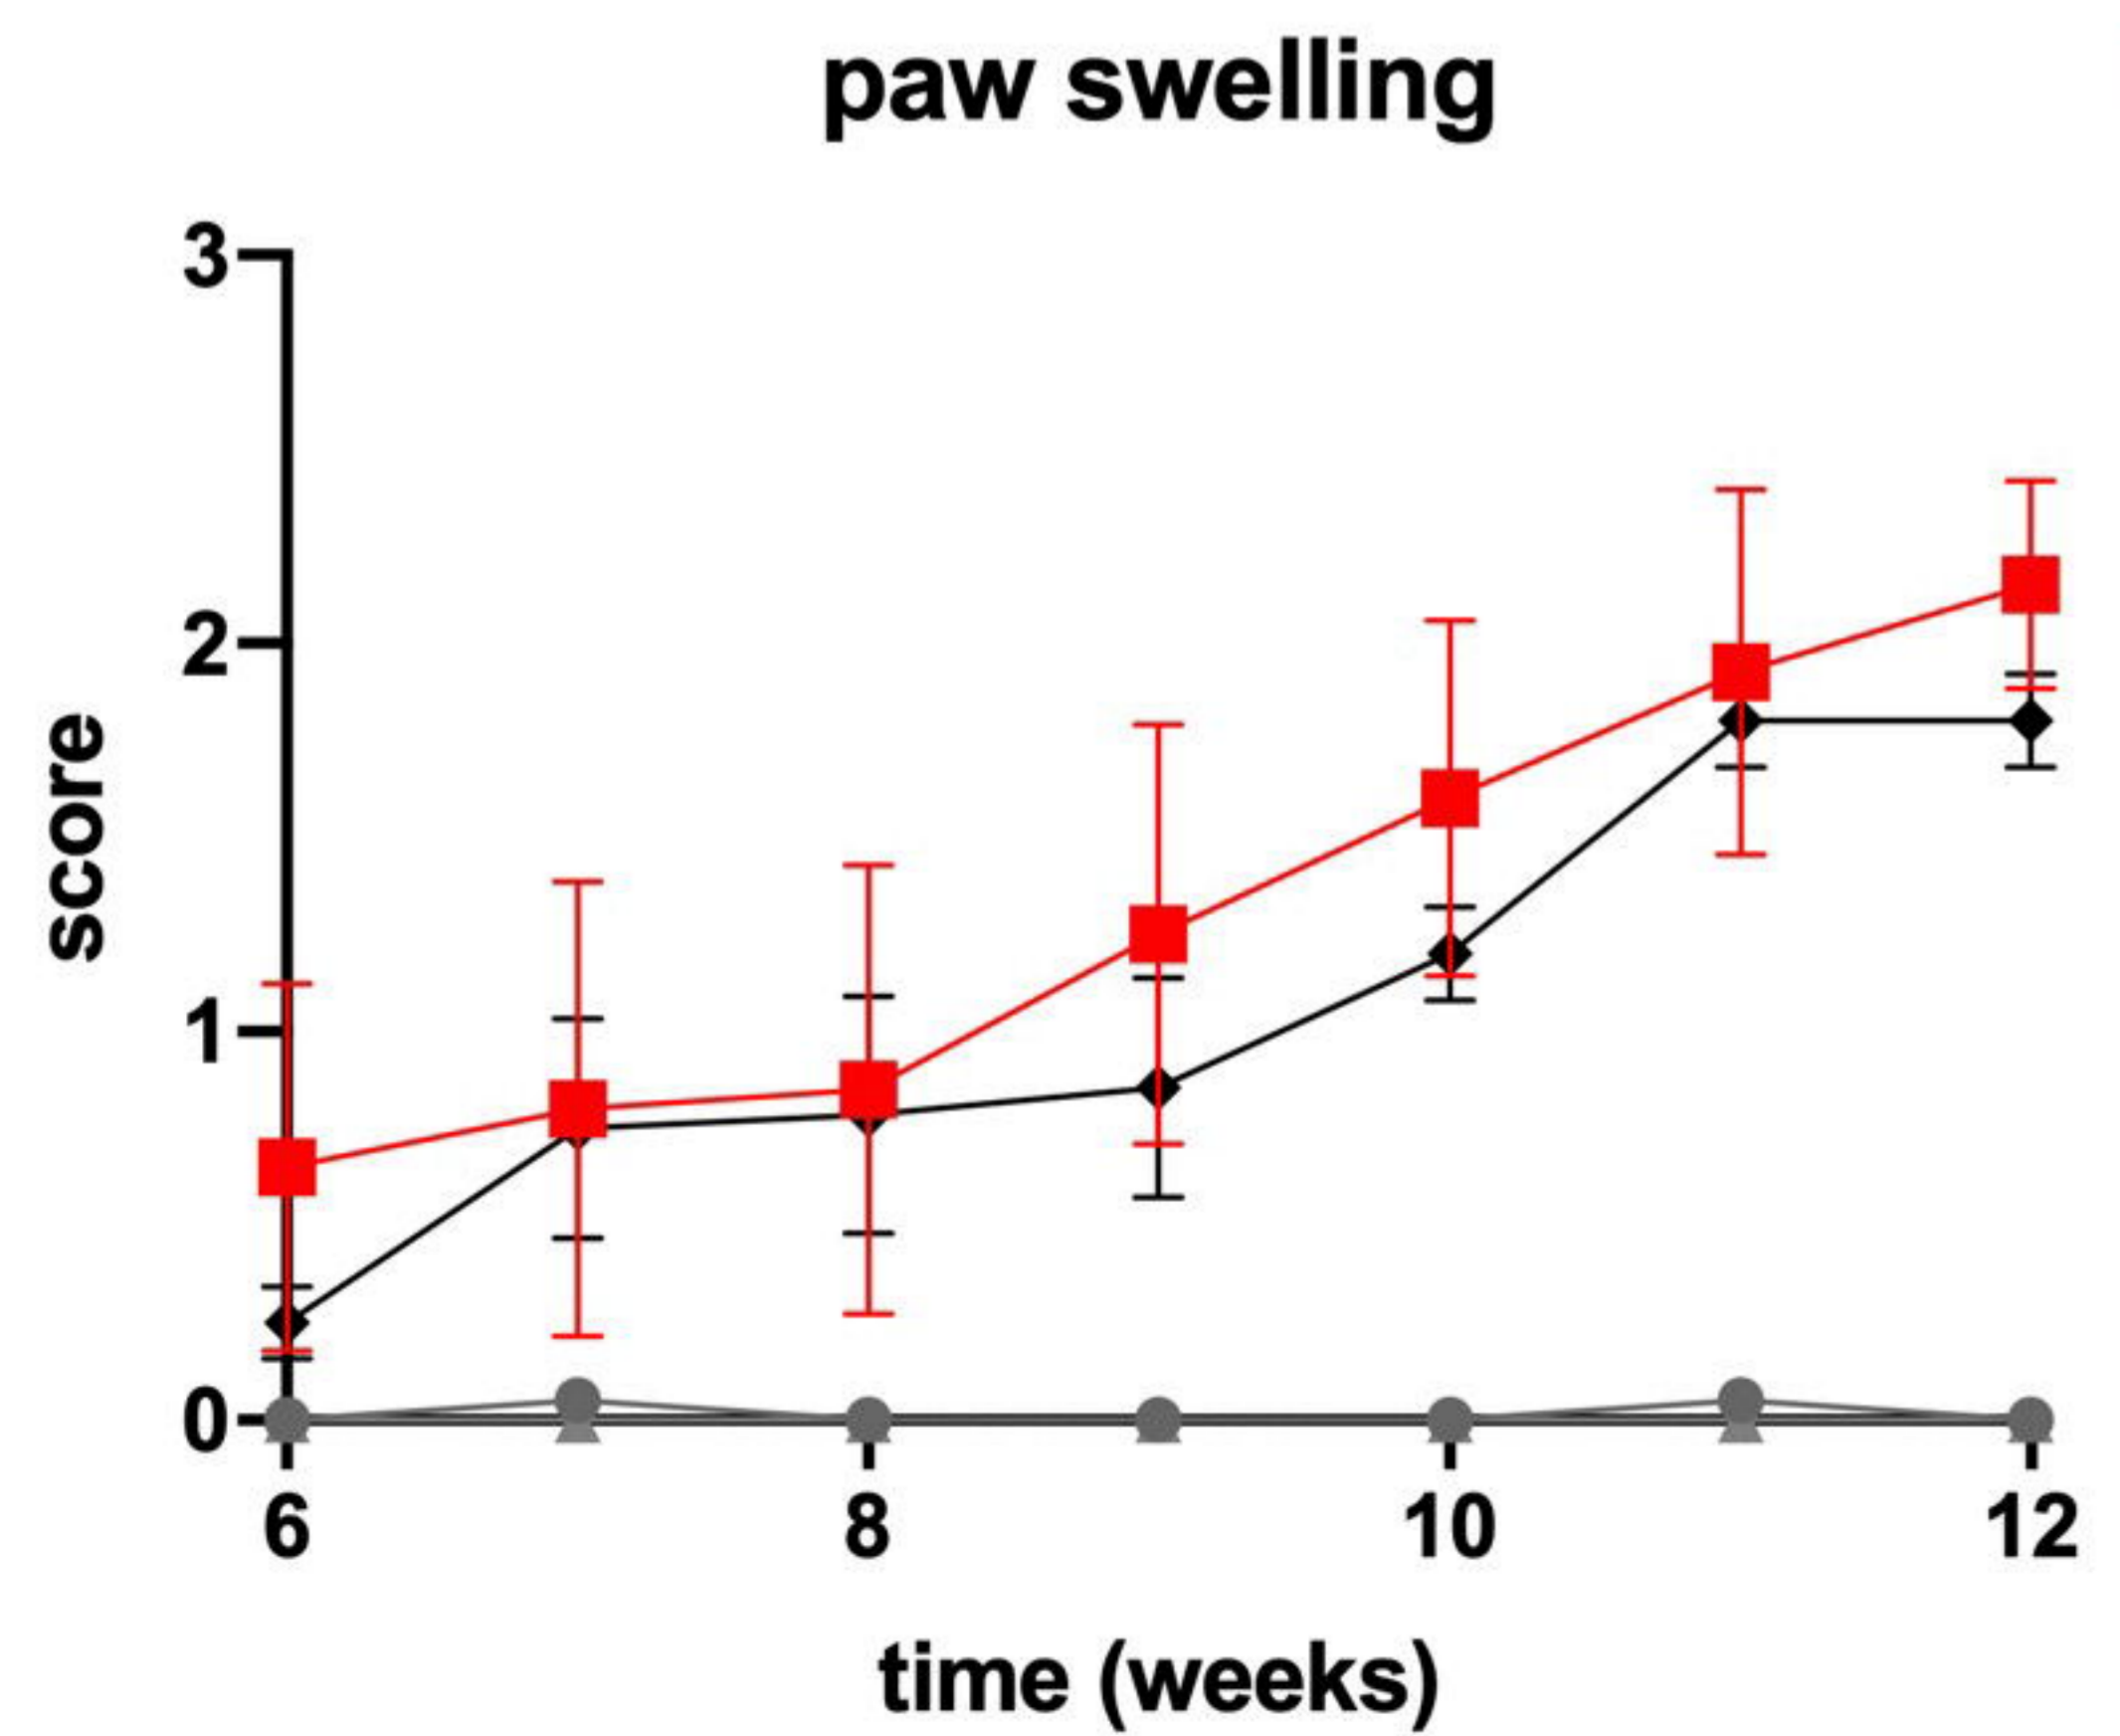

□ wt  
 ■ hTNFtg  
 □ *itga11*<sup>-/-</sup>hTNFtg

**b**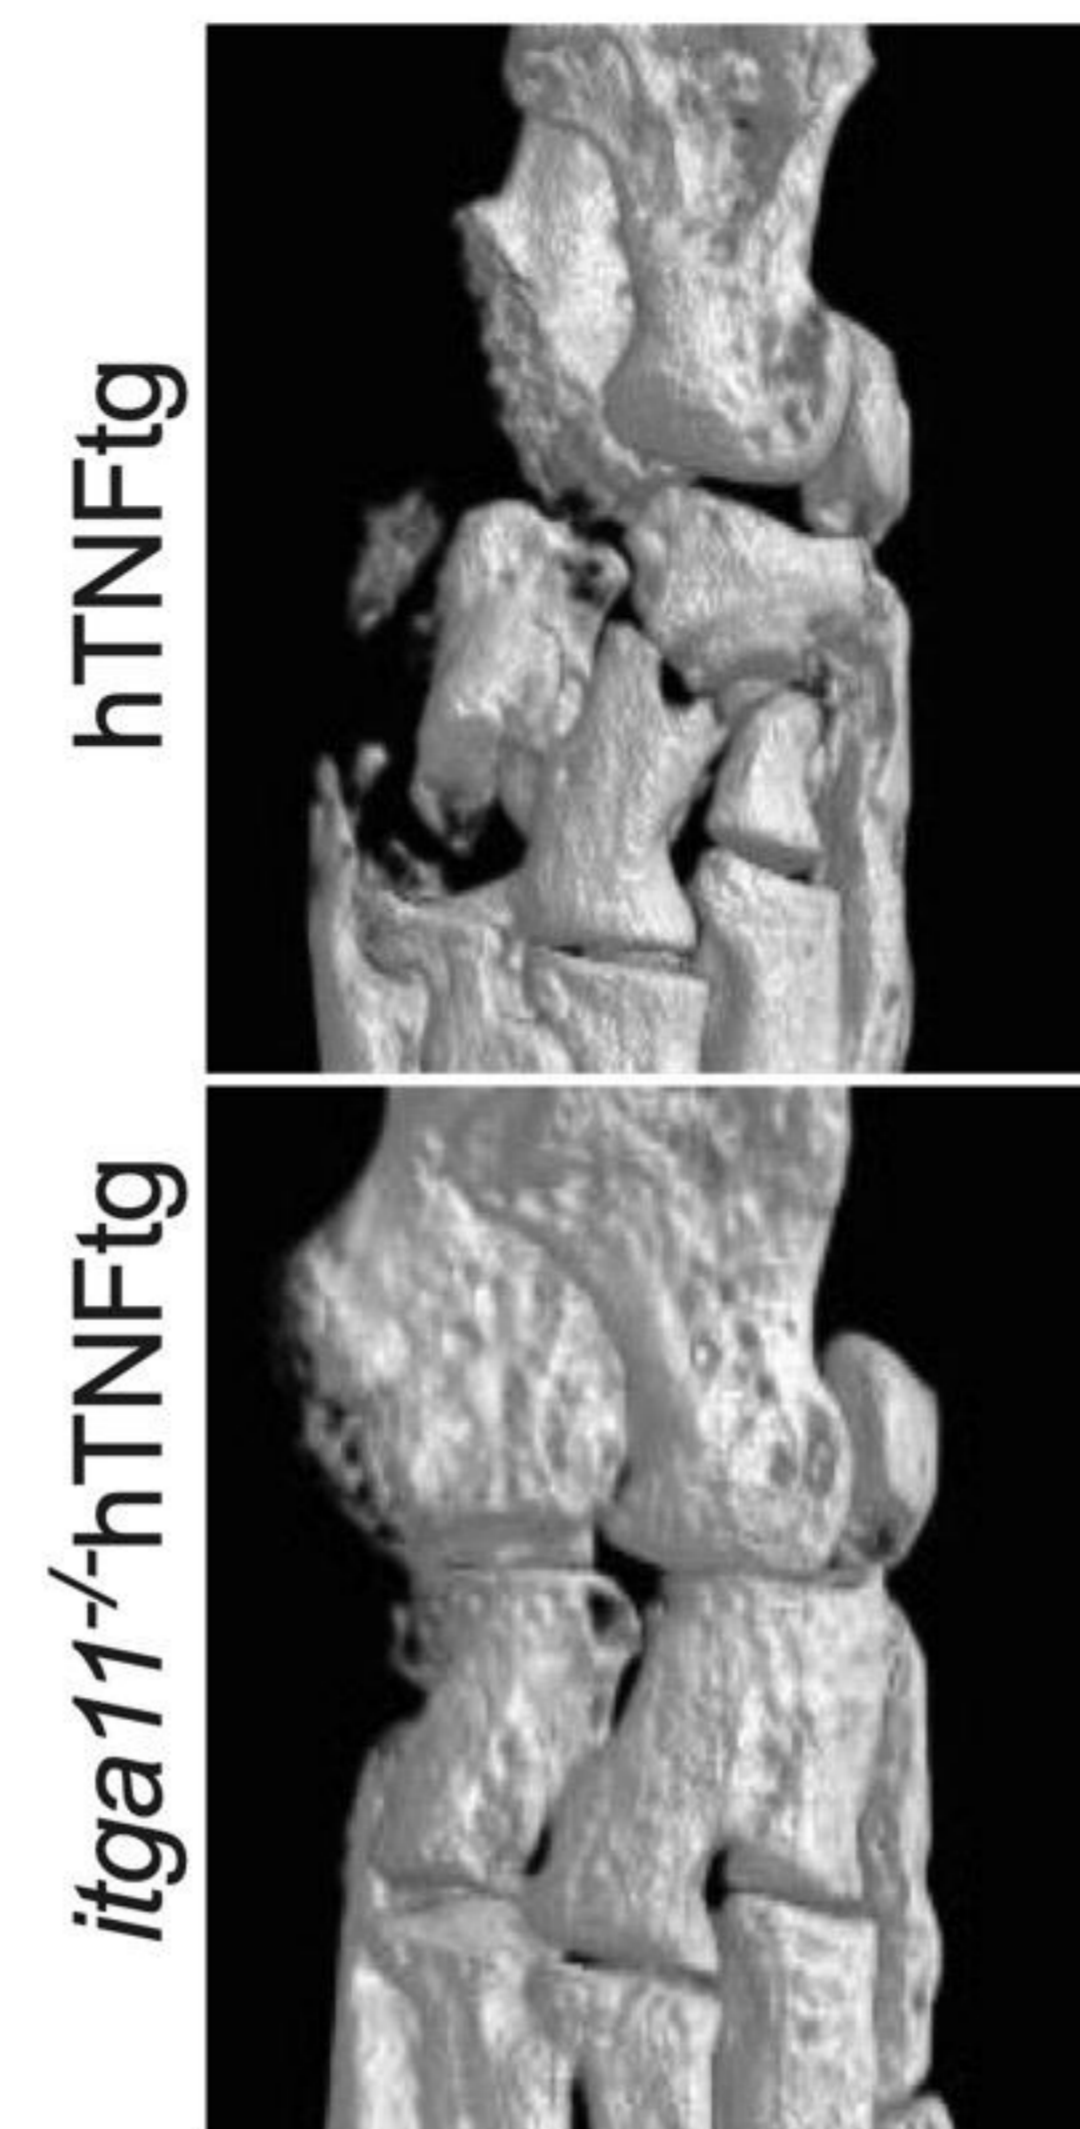**c**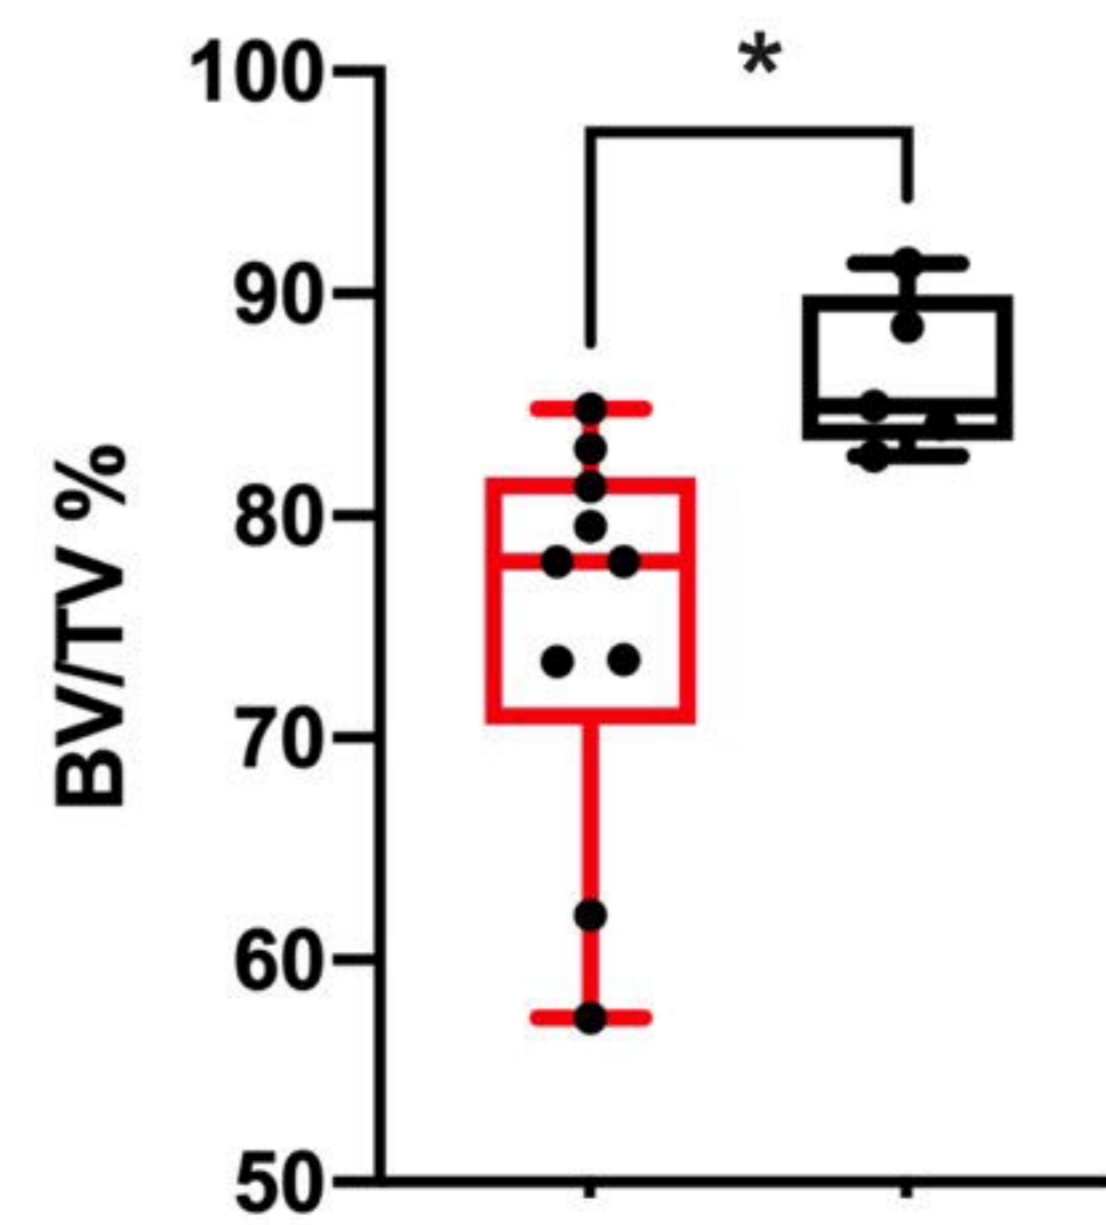**e**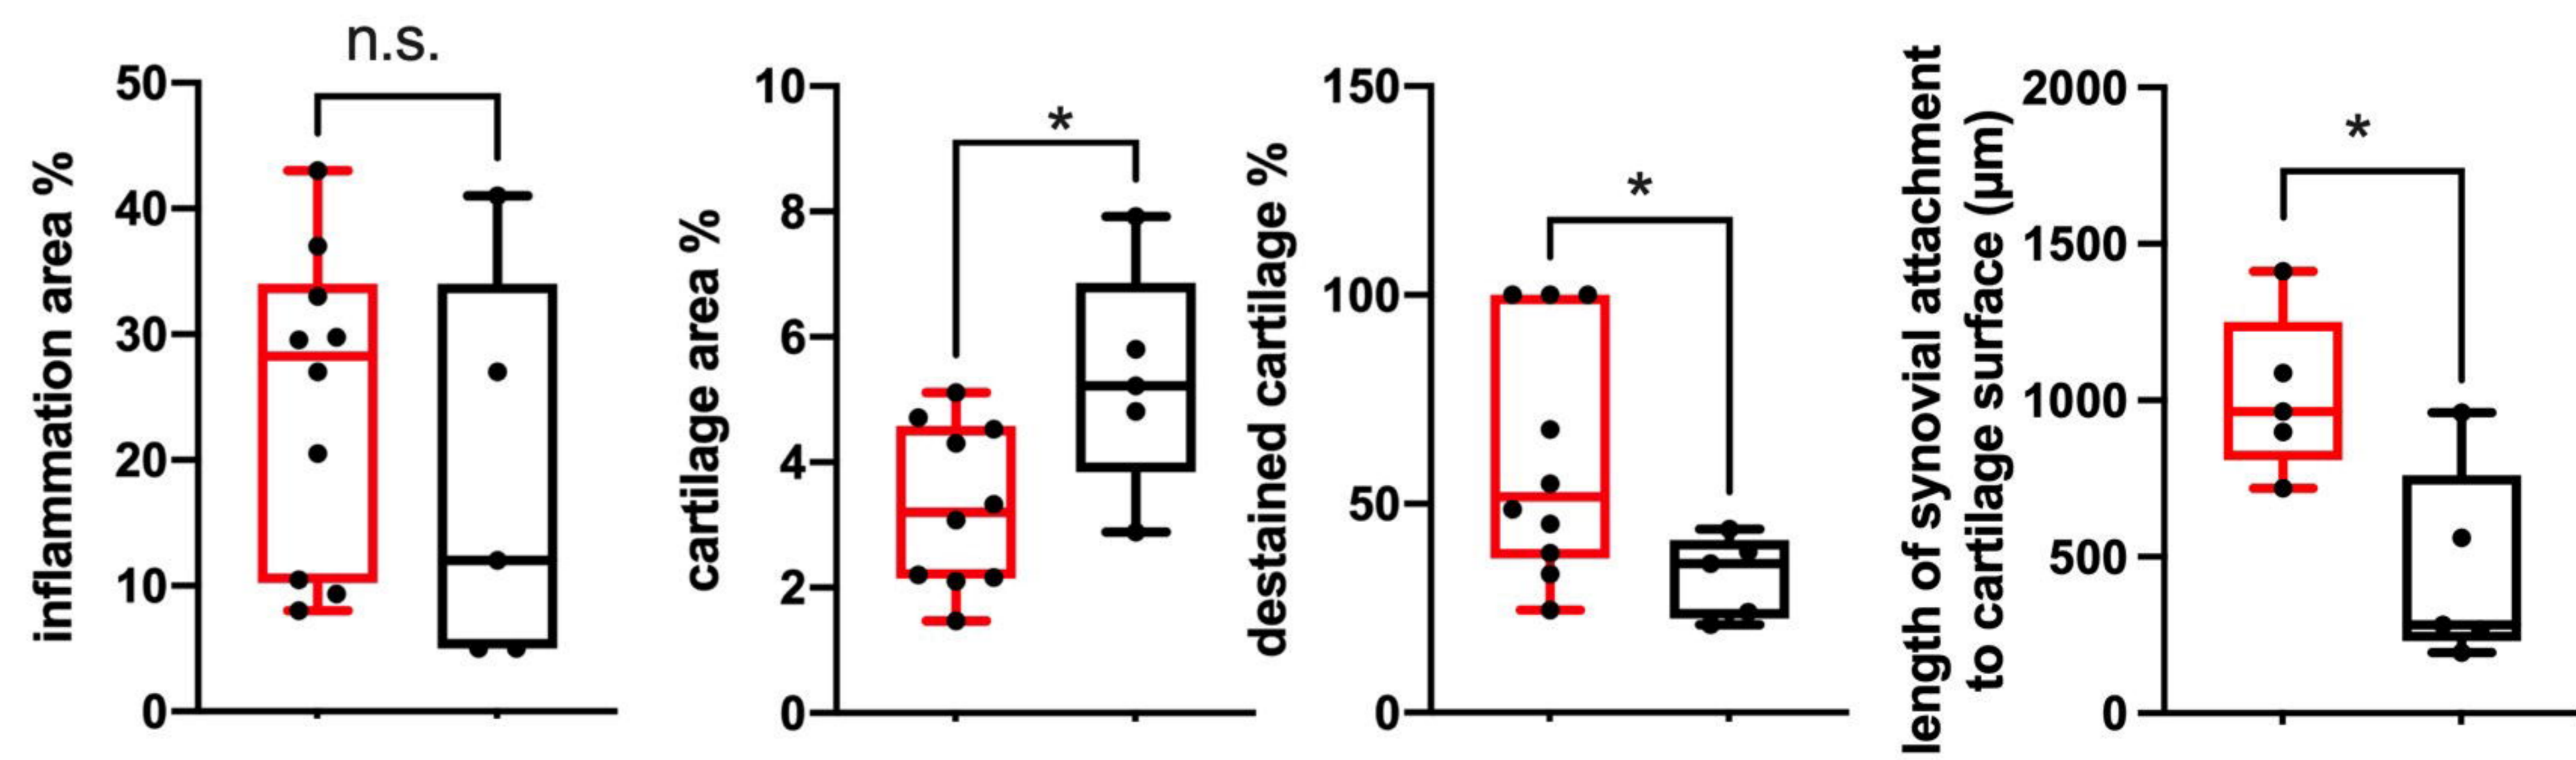**d**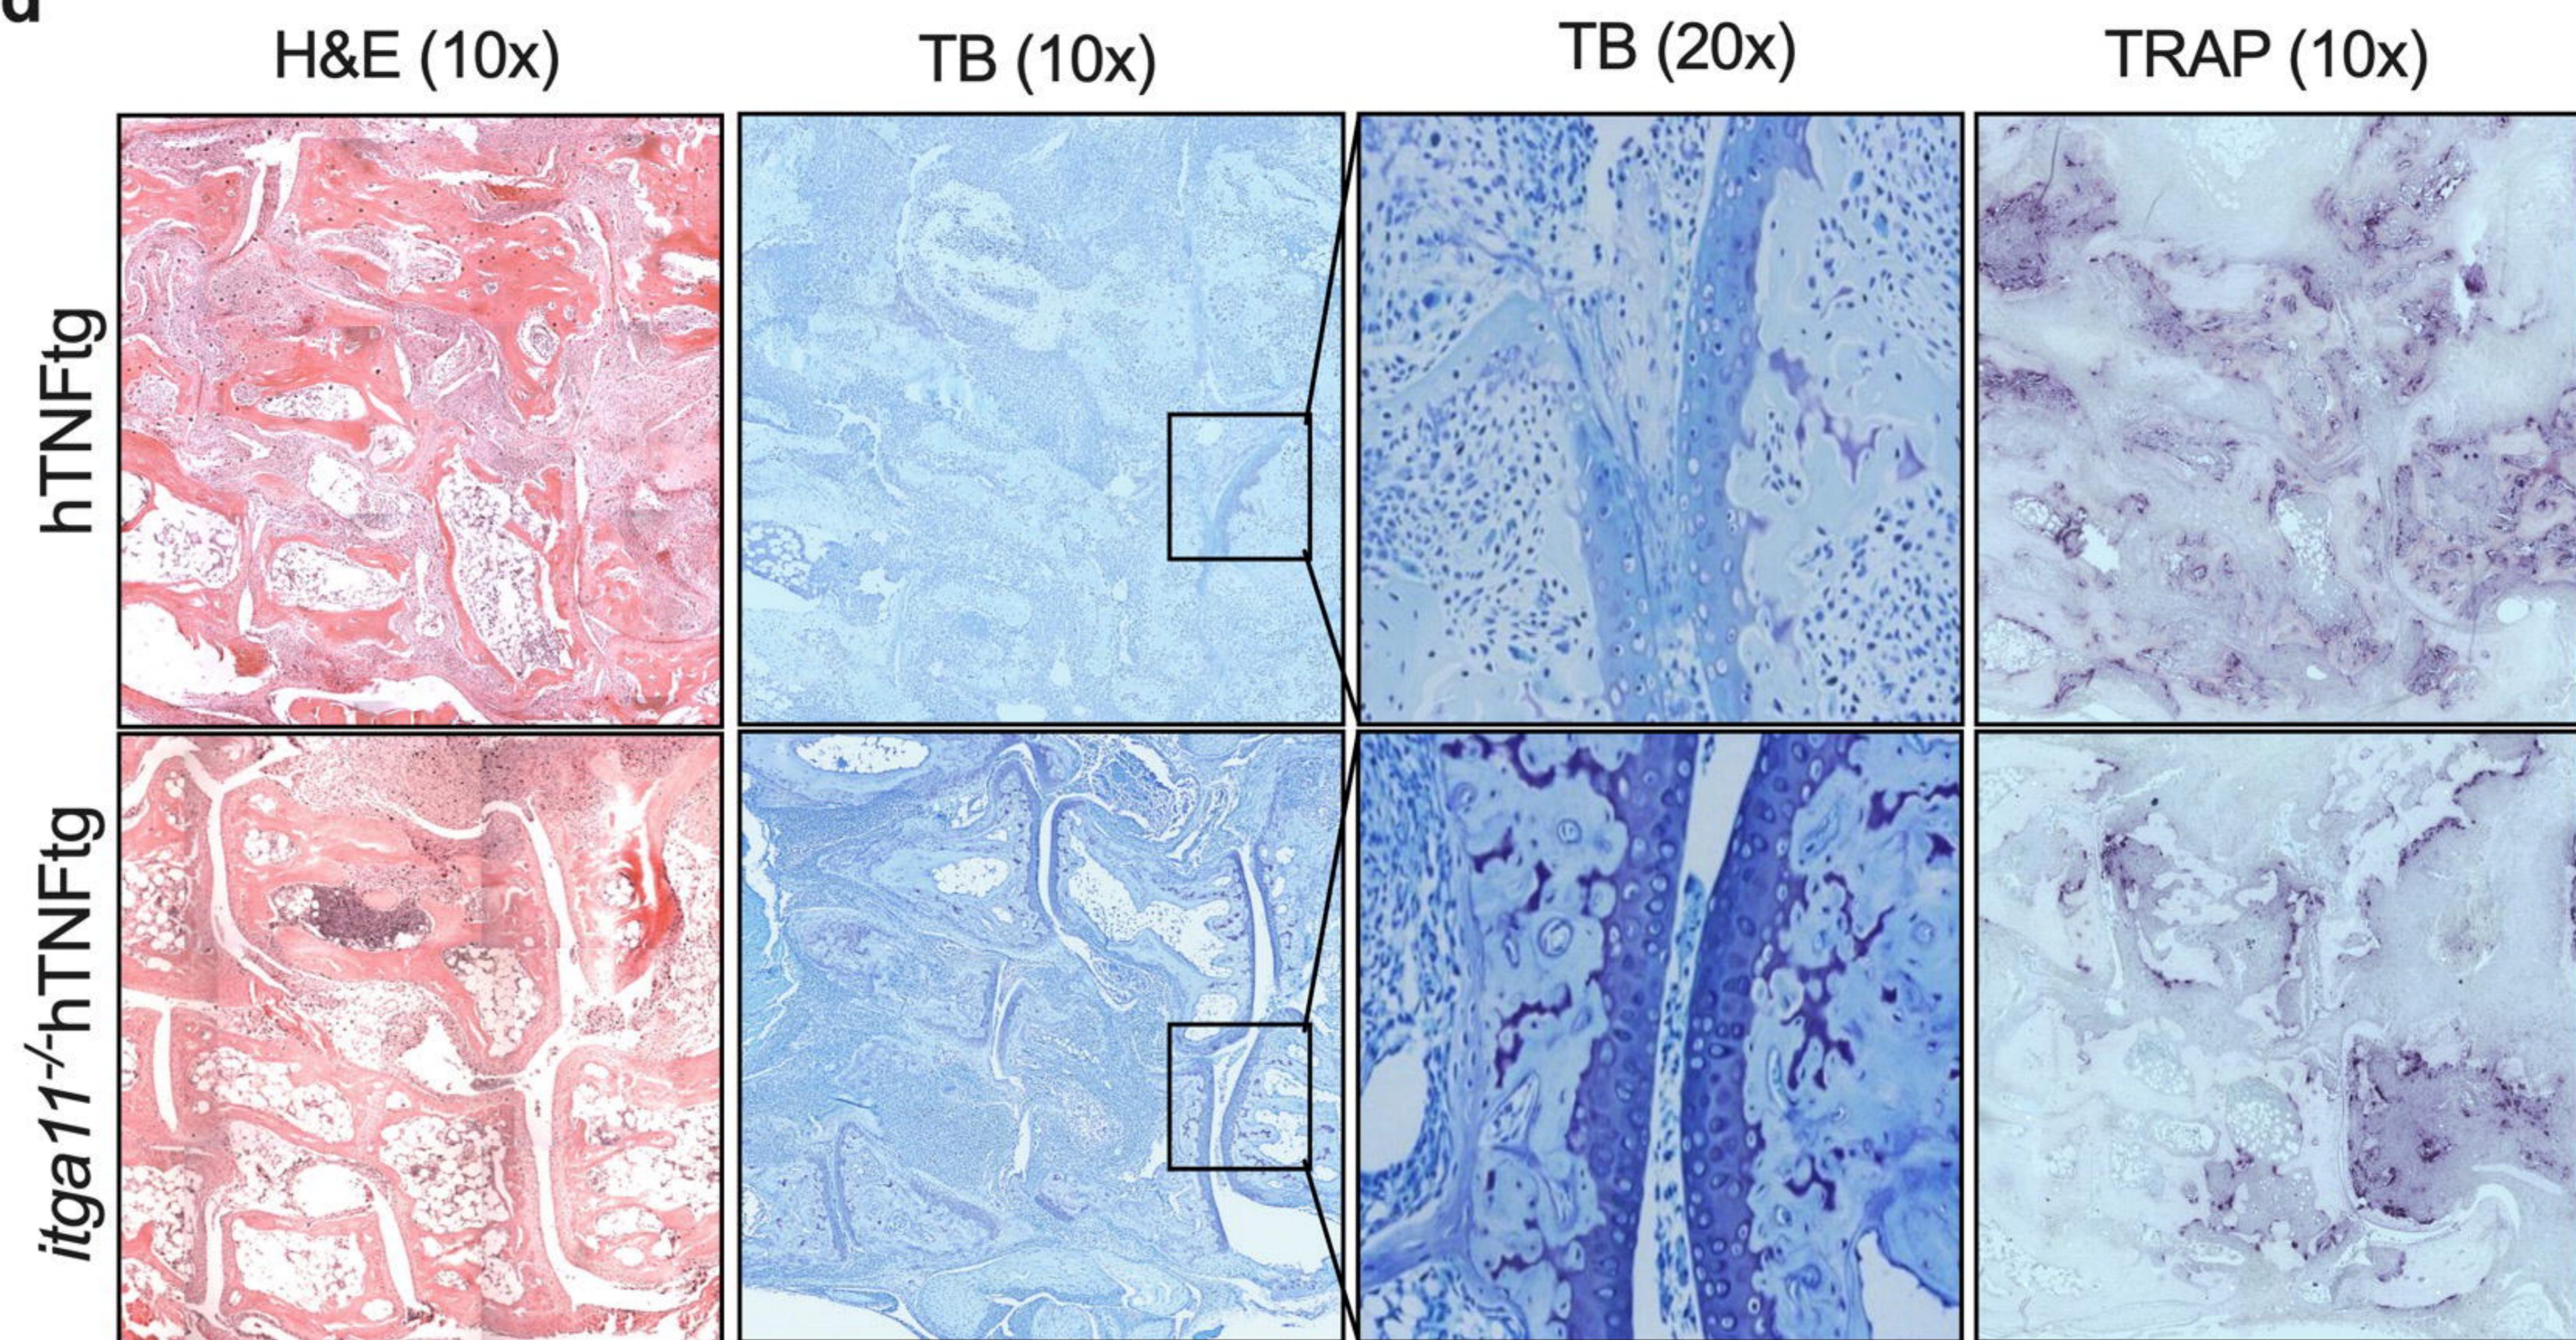

Source: https://www.biorxiv.org/content/10.1101/2022.01.14.476301v1.full.pdf
